# Supplementary material
Source: publisher site journal article supplement (https://www.spandidos-publications.com/4599/downloadSupplementary)
Supplement: Supplementary file 1 [file downloadSupplementary]

## Sheet: up.After-1_vs_Before-1
Table SIV. Differentially Expressed miRNAs
miRNA expression for After-1 vs Before-1 Fold change cutoff: 2.0 Column A: Mature miRNA, the mature miRNA name. Column B: Pre-miRNA, the pre-miRNA name. Column C: Sequence, the mature miRNA sequence. Column D: Fold change, fold change between two samples. Column E: Regulation, 'up' indicates up-regulation, and 'down' indicates down-regulation. Column F ~ G: Tag Counts (normalized), the normalized…
miRNA Information			Fold change & Regulation		Tag counts (normalized)
mature-miRNA	pre-miRNA	mature-sequence	Fold Change	Regulation	After-1	Before-1
hsa-let-7c-5p	hsa-let-7c	UGAGGUAGUAGGUUGUAUGGUU	3.07267	up	1944	632
hsa-let-7d-3p	hsa-let-7d	CUAUACGACCUGCUGCCUUUCU	2.52222	up	226	89
hsa-let-7d-5p	hsa-let-7d	AGAGGUAGUAGGUUGCAUAGUU	2.61078	up	3051	1168
hsa-miR-1-3p	hsa-mir-1-2	UGGAAUGUAAAGAAGUAUGUAU	2.88242	up	2622	909
hsa-miR-1-3p	hsa-mir-1-1	UGGAAUGUAAAGAAGUAUGUAU	2.88242	up	2622	909
hsa-miR-106b-3p	hsa-mir-106b	CCGCACUGUGGGUACUUGCUGC	2.42105	up	45	18
hsa-miR-10b-5p	hsa-mir-10b	UACCCUGUAGAACCGAAUUUGUG	80	up	79
hsa-miR-122-5p	hsa-mir-122	UGGAGUGUGACAAUGGUGUUUG	3.9305	up	13402	3409
hsa-miR-125b-5p	hsa-mir-125b-1	UCCCUGAGACCCUAACUUGUGA	58	up	57
hsa-miR-125b-5p	hsa-mir-125b-2	UCCCUGAGACCCUAACUUGUGA	58	up	57
hsa-miR-128-3p	hsa-mir-128-1	UCACAGUGAACCGGUCUCUUU	2.96833	up	1311	441
hsa-miR-128-3p	hsa-mir-128-2	UCACAGUGAACCGGUCUCUUU	2.96833	up	1311	441
hsa-miR-1299	hsa-mir-1299	UUCUGGAAUUCUGUGUGAGGGA	46	up	45
hsa-miR-133a-3p	hsa-mir-133a-1	UUUGGUCCCCUUCAACCAGCUG	2.42105	up	45	18
hsa-miR-133a-3p	hsa-mir-133a-2	UUUGGUCCCCUUCAACCAGCUG	2.42105	up	45	18
hsa-miR-140-3p	hsa-mir-140	UACCACAGGGUAGAACCACGG	2.11823	up	859	405
hsa-miR-140-5p	hsa-mir-140	CAGUGGUUUUACCCUAUGGUAG	2.68194	up	994	370
hsa-miR-143-3p	hsa-mir-143	UGAGAUGAAGCACUGUAGCUC	2.74327	up	15493	5647
hsa-miR-145-3p	hsa-mir-145	GGAUUCCUGGAAAUACUGUUCU	69	up	68
hsa-miR-148a-3p	hsa-mir-148a	UCAGUGCACUACAGAACUUUGU	2.26879	up	39054	17213
hsa-miR-148a-5p	hsa-mir-148a	AAAGUUCUGAGACACUCCGACU	46	up	45
hsa-miR-152-3p	hsa-mir-152	UCAGUGCAUGACAGAACUUGG	3.9749	up	949	238
hsa-miR-17-5p	hsa-mir-17	CAAAGUGCUUACAGUGCAGGUAG	2.60365	up	3277	1258
hsa-miR-181a-3p	hsa-mir-181a-1	ACCAUCGACCGUUGAUUGUACC	46	up	45
hsa-miR-181d-5p	hsa-mir-181d	AACAUUCAUUGUUGUCGGUGGGU	9.57895	up	181	18
hsa-miR-186-5p	hsa-mir-186	CAAAGAAUUCUCCUUUUGGGCU	2.80403	up	972	346
hsa-miR-191-5p	hsa-mir-191	CAACGGAAUCCCAAAAGCAGCUG	3.69	up	19663	5328
hsa-miR-192-5p	hsa-mir-192	CUGACCUAUGAAUUGACAGCC	3.64476	up	1774	486
hsa-miR-193b-3p	hsa-mir-193b	AACUGGCCCUCAAAGUCCCGCU	46	up	45
hsa-miR-195-5p	hsa-mir-195	UAGCAGCACAGAAAUAUUGGC	46	up	45
hsa-miR-203a-3p	hsa-mir-203a	GUGAAAUGUUUAGGACCACUAG	4.46154	up	57	12
hsa-miR-206	hsa-mir-206	UGGAAUGUAAGGAAGUGUGUGG	3.28391	up	1040	316
hsa-miR-22-3p	hsa-mir-22	AAGCUGCCAGUUGAAGAACUGU	2.84927	up	10396	3648
hsa-miR-22-5p	hsa-mir-22	AGUUCUUCAGUGGCAAGCUUUA	8.76923	up	113	12
hsa-miR-23a-3p	hsa-mir-23a	AUCACAUUGCCAGGGAUUUCC	2.43614	up	2803	1150
hsa-miR-24-3p	hsa-mir-24-1	UGGCUCAGUUCAGCAGGAACAG	2.68041	up	2599	969
hsa-miR-24-3p	hsa-mir-24-2	UGGCUCAGUUCAGCAGGAACAG	2.68041	up	2599	969
hsa-miR-26a-5p	hsa-mir-26a-1	UUCAAGUAAUCCAGGAUAGGCU	2.74572	up	18928	6893
hsa-miR-26a-5p	hsa-mir-26a-2	UUCAAGUAAUCCAGGAUAGGCU	2.74572	up	18928	6893
hsa-miR-27b-3p	hsa-mir-27b	UUCACAGUGGCUAAGUUCUGC	2.33044	up	4294	1842
hsa-miR-29a-3p	hsa-mir-29a	UAGCACCAUCUGAAAUCGGUUA	2.05099	up	723	352
hsa-miR-30a-3p	hsa-mir-30a	CUUUCAGUCGGAUGUUUGCAGC	4.41935	up	136	30
hsa-miR-30a-5p	hsa-mir-30a	UGUAAACAUCCUCGACUGGAAG	4.14376	up	2622	632
hsa-miR-30c-5p	hsa-mir-30c-2	UGUAAACAUCCUACACUCUCAGC	3.33444	up	1006	301
hsa-miR-30c-5p	hsa-mir-30c-1	UGUAAACAUCCUACACUCUCAGC	3.33444	up	1006	301
hsa-miR-30d-5p	hsa-mir-30d	UGUAAACAUCCCCGACUGGAAG	2.85076	up	3571	1252
hsa-miR-3198	hsa-mir-3198-1	GUGGAGUCCUGGGGAAUGGAGA	2.07143	up	57	27
hsa-miR-3198	hsa-mir-3198-2	GUGGAGUCCUGGGGAAUGGAGA	2.07143	up	57	27
hsa-miR-328-3p	hsa-mir-328	CUGGCCCUCUCUGCCCUUCCGU	3.36905	up	565	167
hsa-miR-342-3p	hsa-mir-342	UCUCACACAGAAAUCGCACCCGU	3.53846	up	45	12
hsa-miR-361-5p	hsa-mir-361	UUAUCAGAAUCUCCAGGGGUAC	3.63158	up	68	18
hsa-miR-375-3p	hsa-mir-375	UUUGUUCGUUCGGCUCGCGUGA	3.63158	up	68	18
hsa-miR-378a-3p	hsa-mir-378a	ACUGGACUUGGAGUCAGAAGGC	3.29116	up	4317	1311
hsa-miR-379-5p	hsa-mir-379	UGGUAGACUAUGGAACGUAGG	4.78947	up	90	18
hsa-miR-381-3p	hsa-mir-381	UAUACAAGGGCAAGCUCUCUGU	69	up	68
hsa-miR-382-5p	hsa-mir-382	GAAGUUGUUCGUGGUGGAUUCG	2.45946	up	90	36
hsa-miR-409-3p	hsa-mir-409	GAAUGUUGCUCGGUGAACCCCU	4.78947	up	90	18
hsa-miR-455-5p	hsa-mir-455	UAUGUGCCUUUGGACUACAUCG	7.32258	up	226	30
hsa-miR-483-5p	hsa-mir-483	AAGACGGGAGGAAAGAAGGGAG	272	up	271
hsa-miR-484	hsa-mir-484	UCAGGCUCAGUCCCCUCCCGAU	46	up	45
hsa-miR-499a-5p	hsa-mir-499a	UUAAGACUUGCAGUGAUGUUU	2.32	up	57	24
hsa-miR-671-5p	hsa-mir-671	AGGAAGCCCUGGAGGGGCUGGAG	2.32	up	57	24
hsa-miR-6786-3p	hsa-mir-6786	UGACGCCCCUUCUGAUUCUGCCU	46	up	45
hsa-miR-92a-3p	hsa-mir-92a-1	UAUUGCACUUGUCCCGGCCUGU	2.00554	up	2893	1442
hsa-miR-92a-3p	hsa-mir-92a-2	UAUUGCACUUGUCCCGGCCUGU	2.00554	up	2893	1442
hsa-miR-99a-5p	hsa-mir-99a	AACCCGUAGAUCCGAUCUUGUG	17.8947	up	339	18
hsa-miR-novel-chr11_2543	hsa-mir-novel-chr11_2543	CUGACCUAUGAAUUGACAGC	3.77273	up	746	197
hsa-miR-novel-chr15_6553	hsa-mir-novel-chr15_6553	GGGGCUGGAGAGAUGGC	4.01042	up	384	95
hsa-miR-novel-chr17_8838	hsa-mir-novel-chr17_8838	AGGGAGGACCAGAAGGACUGGGG	69	up	68
hsa-miR-novel-chr17_9261	hsa-mir-novel-chr17_9261	UACCCUGUAGAUCCGAAUUUGU	3.08317	up	1593	516
hsa-miR-novel-chr19_10425	hsa-mir-novel-chr19_10425	ACCAUCGACCGUUGAGUGGAC	3.05263	up	57	18
hsa-miR-novel-chr1_14381	hsa-mir-novel-chr1_14381	AACAUUCAUUGCUGUCGGUGG	2.76	up	68	24
hsa-miR-novel-chr20_14983	hsa-mir-novel-chr20_14983	UUGGUCCCCUUCAACCAGCUGU	3.71311	up	452	121
hsa-miR-novel-chr2_17740	hsa-mir-novel-chr2_17740	UACCCUGUAGAACCGAAUUUGU	3.80677	up	1910	501
hsa-miR-novel-chr3_19892	hsa-mir-novel-chr3_19892	GGGGCCGAGGGAGCGAG	679	up	678
hsa-miR-novel-chr5_22142	hsa-mir-novel-chr5_22142	AAAGAACUUUGAAAAGAG	7.21053	up	136	18
hsa-miR-novel-chr7_25414	hsa-mir-novel-chr7_25414	AGGAAGCCCUGGAGGGGCUGGAGG	2.36207	up	136	57
hsa-miR-novel-chr8_27099	hsa-mir-novel-chr8_27099	GCUUGGAGAAUGAAGGAG	91	up	90
hsa-miR-novel-chr9_27523	hsa-mir-novel-chr9_27523	AUCACAUUGCCAGGGAUU	4	up	83	20

## Sheet: dn.After-1_vs_Before-1
miRNA expression for After-1 vs Before-1 Fold change cutoff: 2.0 Column A: Mature miRNA, the mature miRNA name. Column B: Pre-miRNA, the pre-miRNA name. Column C: Sequence, the mature miRNA sequence. Column D: Fold change, fold change between two samples. Column E: Regulation, 'up' indicates up-regulation, and 'down' indicates down-regulation. Column F ~ G: Tag Counts (normalized), the normalized…
miRNA Information			Fold Change & Regulation		Tag counts (normalized)
mature-miRNA	pre-miRNA	mature-sequence	Fold Change	Regulation	After-1	Before-1
hsa-let-7a-3p	hsa-let-7a-1	CUAUACAAUCUACUGUCUUUC	-19	down		18
hsa-let-7a-3p	hsa-let-7a-3	CUAUACAAUCUACUGUCUUUC	-19	down		18
hsa-let-7a-5p	hsa-let-7a-1	UGAGGUAGUAGGUUGUAUAGUU	-2.70659	down	1168	3163
hsa-let-7a-5p	hsa-let-7a-2	UGAGGUAGUAGGUUGUAUAGUU	-2.70659	down	1168	3163
hsa-let-7a-5p	hsa-let-7a-3	UGAGGUAGUAGGUUGUAUAGUU	-2.70659	down	1168	3163
hsa-let-7i-3p	hsa-let-7i	CUGCGCAAGCUACUGCCUUGCU	-13	down		12
hsa-miR-101-3p	hsa-mir-101-1	UACAGUACUGUGAUAACUGAA	-7.23797	down	373	2706
hsa-miR-101-3p	hsa-mir-101-2	UACAGUACUGUGAUAACUGAA	-7.23797	down	373	2706
hsa-miR-103a-3p	hsa-mir-103a-2	AGCAGCAUUGUACAGGGCUAUGA	-2.36749	down	848	2009
hsa-miR-103a-3p	hsa-mir-103a-1	AGCAGCAUUGUACAGGGCUAUGA	-2.36749	down	848	2009
hsa-miR-106b-5p	hsa-mir-106b	UAAAGUGCUGACAGUGCAGAU	-3.68132	down	90	334
hsa-miR-11400	hsa-mir-11400	UCGGCUGUGUAUCUCUGUGUC	-43	down		42
hsa-miR-1185-1-3p	hsa-mir-1185-1	AUAUACAGGGGGAGACUCUUAU	-13	down		12
hsa-miR-1246	hsa-mir-1246	AAUGGAUUUUUGGAGCAGG	-19	down		18
hsa-miR-127-3p	hsa-mir-127	UCGGAUCCGUCUGAGCUUGGCU	-46	down		45
hsa-miR-1275	hsa-mir-1275	GUGGGGGAGAGGCUGUC	-19	down		18
hsa-miR-1277-3p	hsa-mir-1277	UACGUAGAUAUAUAUGUAUUUU	-19	down		18
hsa-miR-1307-3p	hsa-mir-1307	ACUCGGCGUGGCGUCGGUCGUG	-120	down		119
hsa-miR-1307-5p	hsa-mir-1307	UCGACCGGACCUCGACCGGCU	-19	down		18
hsa-miR-130a-3p	hsa-mir-130a	CAGUGCAAUGUUAAAAGGGCAU	-73	down		72
hsa-miR-130b-3p	hsa-mir-130b	CAGUGCAAUGAUGAAAGGGCAU	-25	down		24
hsa-miR-136-3p	hsa-mir-136	CAUCAUCGUCUCAAAUGAGUCU	-13	down		12
hsa-miR-139-3p	hsa-mir-139	UGGAGACGCGGCCCUGUUGGAGU	-25	down		24
hsa-miR-139-5p	hsa-mir-139	UCUACAGUGCACGUGUCUCCAGU	-55	down		54
hsa-miR-142-5p	hsa-mir-142	CAUAAAGUAGAAAGCACUACU	-3.41758	down	90	310
hsa-miR-144-3p	hsa-mir-144	UACAGUAUAGAUGAUGUACU	-174	down		173
hsa-miR-144-5p	hsa-mir-144	GGAUAUCAUCAUAUACUGUAAG	-25	down		24
hsa-miR-151a-5p	hsa-mir-151a	UCGAGGAGCUCACAGUCUAGU	-34	down		33
hsa-miR-15a-5p	hsa-mir-15a	UAGCAGCACAUAAUGGUUUGUG	-126	down		125
hsa-miR-17-3p	hsa-mir-17	ACUGCAGUGAAGGCACUUGUAG	-67	down		66
hsa-miR-181a-2-3p	hsa-mir-181a-2	ACCACUGACCGUUGACUGUACC	-19	down		18
hsa-miR-181b-5p	hsa-mir-181b-1	AACAUUCAUUGCUGUCGGUGGGU	-11	down		10
hsa-miR-181b-5p	hsa-mir-181b-2	AACAUUCAUUGCUGUCGGUGGGU	-11	down		10
hsa-miR-181c-3p	hsa-mir-181c	AACCAUCGACCGUUGAGUGGAC	-10	down		9
hsa-miR-182-5p	hsa-mir-182	UUUGGCAAUGGUAGAACUCACACU	-19	down		18
hsa-miR-183-5p	hsa-mir-183	UAUGGCACUGGUAGAAUUCACU	-31	down		30
hsa-miR-193a-5p	hsa-mir-193a	UGGGUCUUUGCGGGCGAGAUGA	-323	down		322
hsa-miR-194-5p	hsa-mir-194-1	UGUAACAGCAACUCCAUGUGGA	-16	down		15
hsa-miR-194-5p	hsa-mir-194-2	UGUAACAGCAACUCCAUGUGGA	-16	down		15
hsa-miR-195-3p	hsa-mir-195	CCAAUAUUGGCUGUGCUGCUCC	-19	down		18
hsa-miR-197-3p	hsa-mir-197	UUCACCACCUUCUCCACCCAGC	-78	down		77
hsa-miR-199a-3p	hsa-mir-199a-1	ACAGUAGUCUGCACAUUGGUUA	-2.10662	down	271	572
hsa-miR-199a-3p	hsa-mir-199a-2	ACAGUAGUCUGCACAUUGGUUA	-2.10662	down	271	572
hsa-miR-199a-5p	hsa-mir-199a-1	CCCAGUGUUCAGACUACCUGUUC	-3.19565	down	45	146
hsa-miR-199a-5p	hsa-mir-199a-2	CCCAGUGUUCAGACUACCUGUUC	-3.19565	down	45	146
hsa-miR-199b-3p	hsa-mir-199b	ACAGUAGUCUGCACAUUGGUUA	-2.10662	down	271	572
hsa-miR-199b-5p	hsa-mir-199b	CCCAGUGUUUAGACUAUCUGUUC	-93	down		92
hsa-miR-19a-3p	hsa-mir-19a	UGUGCAAAUCUAUGCAAAACUGA	-239	down		238
hsa-miR-20b-5p	hsa-mir-20b	CAAAGUGCUCAUAGUGCAGGUAG	-61	down		60
hsa-miR-21-3p	hsa-mir-21	CAACACCAGUCGAUGGGCUGU	-19	down		18
hsa-miR-210-3p	hsa-mir-210	CUGUGCGUGUGACAGCGGCUGA	-3.97802	down	90	361
hsa-miR-2110	hsa-mir-2110	UUGGGGAAACGGCCGCUGAGUG	-114	down		113
hsa-miR-221-5p	hsa-mir-221	ACCUGGCAUACAAUGUAGAUUU	-10	down		9
hsa-miR-222-3p	hsa-mir-222	AGCUACAUCUGGCUACUGGGU	-61	down		60
hsa-miR-223-3p	hsa-mir-223	UGUCAGUUUGUCAAAUACCCCA	-7.2649	down	452	3290
hsa-miR-223-5p	hsa-mir-223	CGUGUAUUUGACAAGCUGAGUU	-84	down		83
hsa-miR-2355-3p	hsa-mir-2355	AUUGUCCUUGCUGUUUGGAGAU	-25	down		24
hsa-miR-23a-5p	hsa-mir-23a	GGGGUUCCUGGGGAUGGGAUUU	-25	down		24
hsa-miR-23b-3p	hsa-mir-23b	AUCACAUUGCCAGGGAUUACCAC	-19	down		18
hsa-miR-25-5p	hsa-mir-25	AGGCGGAGACUUGGGCAAUUG	-31	down		30
hsa-miR-27a-5p	hsa-mir-27a	AGGGCUUAGCUGCUUGUGAGCA	-37	down		36
hsa-miR-28-3p	hsa-mir-28	CACUAGAUUGUGAGCUCCUGGA	-2.51754	down	113	286
hsa-miR-28-5p	hsa-mir-28	AAGGAGCUCACAGUCUAUUGAG	-31	down		30
hsa-miR-29b-3p	hsa-mir-29b-1	UAGCACCAUUUGAAAUCAGUGUU	-37	down		36
hsa-miR-29b-3p	hsa-mir-29b-2	UAGCACCAUUUGAAAUCAGUGUU	-37	down		36
hsa-miR-29c-3p	hsa-mir-29c	UAGCACCAUUUGAAAUCGGUUA	-150	down		149
hsa-miR-30e-3p	hsa-mir-30e	CUUUCAGUCGGAUGUUUACAGC	-2.51572	down	158	399
hsa-miR-3150b-3p	hsa-mir-3150b	UGAGGAGAUCGUCGAGGUUGG	-43	down		42
hsa-miR-32-5p	hsa-mir-32	UAUUGCACAUUACUAAGUUGCA	-19	down		18
hsa-miR-320a-3p	hsa-mir-320a	AAAAGCUGGGUUGAGAGGGCGA	-8.14086	down	18329	149221
hsa-miR-320b	hsa-mir-320b-1	AAAAGCUGGGUUGAGAGGGCAA	-16	down		15
hsa-miR-320b	hsa-mir-320b-2	AAAAGCUGGGUUGAGAGGGCAA	-16	down		15
hsa-miR-320c	hsa-mir-320c-1	AAAAGCUGGGUUGAGAGGGU	-10	down		9
hsa-miR-320c	hsa-mir-320c-2	AAAAGCUGGGUUGAGAGGGU	-10	down		9
hsa-miR-326	hsa-mir-326	CCUCUGGGCCCUUCCUCCAG	-43	down		42
hsa-miR-330-3p	hsa-mir-330	GCAAAGCACACGGCCUGCAGAGA	-13	down		12
hsa-miR-330-5p	hsa-mir-330	UCUCUGGGCCUGUGUCUUAGGC	-19	down		18
hsa-miR-335-3p	hsa-mir-335	UUUUUCAUUAUUGCUCCUGACC	-13	down		12
hsa-miR-339-3p	hsa-mir-339	UGAGCGCCUCGACGACAGAGCCG	-25	down		24
hsa-miR-340-5p	hsa-mir-340	UUAUAAAGCAAUGAGACUGAUU	-2.51163	down	429	1079
hsa-miR-361-3p	hsa-mir-361	UCCCCCAGGUGUGAUUCUGAUUU	-61	down		60
hsa-miR-3613-5p	hsa-mir-3613	UGUUGUACUUUUUUUUUUGUUC	-222	down		221
hsa-miR-3617-5p	hsa-mir-3617	AAAGACAUAGUUGCAAGAUGGG	-13	down		12
hsa-miR-3661	hsa-mir-3661	UGACCUGGGACUCGGACAGCUG	-19	down		18
hsa-miR-370-3p	hsa-mir-370	GCCUGCUGGGGUGGAACCUGGU	-3	down	45	137
hsa-miR-374a-3p	hsa-mir-374a	CUUAUCAGAUUGUAUUGUAAUU	-168	down		167
hsa-miR-374a-5p	hsa-mir-374a	UUAUAAUACAACCUGAUAAGUG	-144	down		143
hsa-miR-374b-5p	hsa-mir-374b	AUAUAAUACAACCUGCUAAGUG	-156	down		155
hsa-miR-376c-3p	hsa-mir-376c	AACAUAGAGGAAAUUCCACGU	-19	down		18
hsa-miR-378a-5p	hsa-mir-378a	CUCCUGACUCCAGGUCCUGUGU	-13	down		12
hsa-miR-378g	hsa-mir-378g	ACUGGGCUUGGAGUCAGAAG	-19	down		18
hsa-miR-424-5p	hsa-mir-424	CAGCAGCAAUUCAUGUUUUGAA	-19	down		18
hsa-miR-425-3p	hsa-mir-425	AUCGGGAAUGUCGUGUCCGCCC	-37	down		36
hsa-miR-4286	hsa-mir-4286	ACCCCACUCCUGGUACC	-13	down		12
hsa-miR-4430	hsa-mir-4430	AGGCUGGAGUGAGCGGAG	-31	down		30
hsa-miR-4470	hsa-mir-4470	UGGCAAACGUGGAAGCCGAGA	-37	down		36
hsa-miR-4508	hsa-mir-4508	GCGGGGCUGGGCGCGCG	-19	down		18
hsa-miR-450a-5p	hsa-mir-450a-1	UUUUGCGAUGUGUUCCUAAUAU	-17	down		16
hsa-miR-450a-5p	hsa-mir-450a-2	UUUUGCGAUGUGUUCCUAAUAU	-17	down		16
hsa-miR-450b-5p	hsa-mir-450b	UUUUGCAAUAUGUUCCUGAAUA	-13	down		12
hsa-miR-451a	hsa-mir-451a	AAACCGUUACCAUUACUGAGUU	-2.84116	down	723	2056
hsa-miR-4646-5p	hsa-mir-4646	ACUGGGAAGAGGAGCUGAGGGA	-13	down		12
hsa-miR-4665-5p	hsa-mir-4665	CUGGGGGACGCGUGAGCGCGAGC	-43	down		42
hsa-miR-4677-3p	hsa-mir-4677	UCUGUGAGACCAAAGAACUACU	-13	down		12
hsa-miR-4741	hsa-mir-4741	CGGGCUGUCCGGAGGGGUCGGCU	-19	down		18
hsa-miR-490-3p	hsa-mir-490	CAACCUGGAGGACUCCAUGCUG	-880	down		879
hsa-miR-493-5p	hsa-mir-493	UUGUACAUGGUAGGCUUUCAUU	-13	down		12
hsa-miR-495-3p	hsa-mir-495	AAACAAACAUGGUGCACUUCUU	-19	down		18
hsa-miR-500a-3p	hsa-mir-500a	AUGCACCUGGGCAAGGAUUCUG	-13	down		12
hsa-miR-501-3p	hsa-mir-501	AAUGCACCCGGGCAAGGAUUCU	-37	down		36
hsa-miR-505-5p	hsa-mir-505	GGGAGCCAGGAAGUAUUGAUGU	-31	down		30
hsa-miR-509-3-5p	hsa-mir-509-3	UACUGCAGACGUGGCAAUCAUG	-25	down		24
hsa-miR-5187-5p	hsa-mir-5187	UGGGAUGAGGGAUUGAAGUGGA	-19	down		18
hsa-miR-532-5p	hsa-mir-532	CAUGCCUUGAGUGUAGGACCGU	-2.49451	down	90	226
hsa-miR-542-3p	hsa-mir-542	UGUGACAGAUUGAUAACUGAAA	-46	down		45
hsa-miR-548e-3p	hsa-mir-548e	AAAAACUGAGACUACUUUUGCA	-49	down		48
hsa-miR-551a	hsa-mir-551a	GCGACCCACUCUUGGUUUCCA	-25	down		24
hsa-miR-5588-5p	hsa-mir-5588	ACUGGCAUUAGUGGGACUUUU	-19	down		18
hsa-miR-574-5p	hsa-mir-574	UGAGUGUGUGUGUGUGAGUGUGU	-132	down		131
hsa-miR-576-3p	hsa-mir-576	AAGAUGUGGAAAAAUUGGAAUC	-19	down		18
hsa-miR-590-3p	hsa-mir-590	UAAUUUUAUGUAUAAGCUAGU	-13	down		12
hsa-miR-625-3p	hsa-mir-625	GACUAUAGAACUUUCCCCCUCA	-13	down		12
hsa-miR-627-5p	hsa-mir-627	GUGAGUCUCUAAGAAAAGAGGA	-13	down		12
hsa-miR-629-5p	hsa-mir-629	UGGGUUUACGUUGGGAGAACU	-4.32759	down	57	250
hsa-miR-6515-5p	hsa-mir-6515	UUGGAGGGUGUGGAAGACAUC	-61	down		60
hsa-miR-652-3p	hsa-mir-652	AAUGGCGCCACUAGGGUUGUG	-6.70248	down	362	2432
hsa-miR-6734-5p	hsa-mir-6734	UUGAGGGGAGAAUGAGGUGGAGA	-25	down		24
hsa-miR-6735-3p	hsa-mir-6735	AGGCCUGUGGCUCCUCCCUCAG	-13	down		12
hsa-miR-6842-3p	hsa-mir-6842	UUGGCUGGUCUCUGCUCCGCAG	-16	down		15
hsa-miR-6852-5p	hsa-mir-6852	CCCUGGGGUUCUGAGGACAUG	-13	down		12
hsa-miR-7-5p	hsa-mir-7-1	UGGAAGACUAGUGAUUUUGUUGUU	-2.31481	down	53	124
hsa-miR-7-5p	hsa-mir-7-2	UGGAAGACUAGUGAUUUUGUUGUU	-2.31481	down	53	124
hsa-miR-7-5p	hsa-mir-7-3	UGGAAGACUAGUGAUUUUGUUGUU	-2.31481	down	53	124
hsa-miR-708-5p	hsa-mir-708	AAGGAGCUUACAAUCUAGCUGGG	-25	down		24
hsa-miR-766-3p	hsa-mir-766	ACUCCAGCCCCACAGCCUCAGC	-25	down		24
hsa-miR-7974	hsa-mir-7974	AGGCUGUGAUGCUCUCCUGAGCCC	-13	down		12
hsa-miR-873-3p	hsa-mir-873	GGAGACUGAUGAGUUCCCGGGA	-13	down		12
hsa-miR-873-5p	hsa-mir-873	GCAGGAACUUGUGAGUCUCCU	-13	down		12
hsa-miR-941	hsa-mir-941-1	CACCCGGCUGUGUGCACAUGUGC	-12	down		11
hsa-miR-941	hsa-mir-941-2	CACCCGGCUGUGUGCACAUGUGC	-12	down		11
hsa-miR-941	hsa-mir-941-3	CACCCGGCUGUGUGCACAUGUGC	-12	down		11
hsa-miR-941	hsa-mir-941-4	CACCCGGCUGUGUGCACAUGUGC	-12	down		11
hsa-miR-941	hsa-mir-941-5	CACCCGGCUGUGUGCACAUGUGC	-12	down		11
hsa-miR-novel-chr10_1124	hsa-mir-novel-chr10_1124	ACUCGGCGUGGCGUCGGUCGUGG	-6.53431	down	203	1332
hsa-miR-novel-chr10_220	hsa-mir-novel-chr10_220	UGGCUGGCUGCUCCGGGCACUGG	-19	down		18
hsa-miR-novel-chr11_1678	hsa-mir-novel-chr11_1678	AGGAAAUGGCUGGAGCCUG	-37	down		36
hsa-miR-novel-chr11_2733	hsa-mir-novel-chr11_2733	CGGUGGGGGUAGGGGGUG	-19	down		18
hsa-miR-novel-chr14_5271	hsa-mir-novel-chr14_5271	GAAGCUCAGAGGGCUCUGAUUC	-70	down		69
hsa-miR-novel-chr15_6007	hsa-mir-novel-chr15_6007	UGGACUUGGAGUCAGAAG	-57	down		56
hsa-miR-novel-chr15_6643	hsa-mir-novel-chr15_6643	UGGGUUUACGUUGGGAGAACUU	-12.7586	down	57	739
hsa-miR-novel-chr16_7074	hsa-mir-novel-chr16_7074	AAAAGCUGAGAAAGAGGA	-19	down		18
hsa-miR-novel-chr18_9936	hsa-mir-novel-chr18_9936	CCCGGGAGUGUGACCCAGAG	-13	down		12
hsa-miR-novel-chr19_10726	hsa-mir-novel-chr19_10726	UGAGACCUCUGGGUUCUGAG	-1104	down		1103
hsa-miR-novel-chr19_11281	hsa-mir-novel-chr19_11281	GGGAAGGUGGCUCGGGGGG	-37	down		36
hsa-miR-novel-chr19_11346	hsa-mir-novel-chr19_11346	AGAAGGGAGGGUGAGACCUGG	-19	down		18
hsa-miR-novel-chr19_11567	hsa-mir-novel-chr19_11567	UGAGGAGGAUCUGAAGGAUUGG	-49	down		48
hsa-miR-novel-chr1_12335	hsa-mir-novel-chr1_12335	UGUGGCCCCAGCGUGCUGUGG	-13	down		12
hsa-miR-novel-chr1_12353	hsa-mir-novel-chr1_12353	UGUGGCCCCAGCGUGCUGUGG	-13	down		12
hsa-miR-novel-chr20_14682	hsa-mir-novel-chr20_14682	UUGUGAAUGGGGGAACAUAG	-25	down		24
hsa-miR-novel-chr22_16369	hsa-mir-novel-chr22_16369	AGCUGCUGGUCUGGAAACUCAGU	-19	down		18
hsa-miR-novel-chr22_16451	hsa-mir-novel-chr22_16451	AGGCCAGGGUGGGACUGGGA	-25	down		24
hsa-miR-novel-chr2_17026	hsa-mir-novel-chr2_17026	AUCUCAUGCCUGUGCUCCGGAU	-15	down		14
hsa-miR-novel-chr2_17520	hsa-mir-novel-chr2_17520	CUGCUGGGAGAACUGGAG	-13	down		12
hsa-miR-novel-chr2_17891	hsa-mir-novel-chr2_17891	UGCGUGGGAGGAAGGACCAGGC	-13	down		12
hsa-miR-novel-chr3_19235	hsa-mir-novel-chr3_19235	AACUGUGGAGUGAGAAG	-19	down		18
hsa-miR-novel-chr3_19986	hsa-mir-novel-chr3_19986	UGGGAGGACUUGAAGAAGACU	-19	down		18
hsa-miR-novel-chr3_20035	hsa-mir-novel-chr3_20035	ACUUCUGCCUGUGGGUCUGAG	-19	down		18
hsa-miR-novel-chr3_20465	hsa-mir-novel-chr3_20465	UGGAGAGCUGUUGAAAUGCAGA	-19	down		18
hsa-miR-novel-chr4_20929	hsa-mir-novel-chr4_20929	GGGGGAAUGGCUGAGGAGAUGGA	-19	down		18
hsa-miR-novel-chr5_23088	hsa-mir-novel-chr5_23088	GCUGGGGAGGUGAACUGGUG	-37	down		36
hsa-miR-novel-chr7_25349	hsa-mir-novel-chr7_25349	GUGAGGGCUCUGAGGAUGAACC	-19	down		18
hsa-miR-novel-chr7_25437	hsa-mir-novel-chr7_25437	UGGAAUGGCCUGAAGGUGGA	-13	down		12
hsa-miR-novel-chr7_26019	hsa-mir-novel-chr7_26019	UUUGGCAAUGGUAGAACUCACA	-46	down		45
hsa-miR-novel-chr8_26363	hsa-mir-novel-chr8_26363	AAAAGCUGGGUUGAGAGG	-17	down		16
hsa-miR-novel-chrX_29044	hsa-mir-novel-chrX_29044	AGCUACAUUGUCUGCUGGGUUUCA	-10	down		9
hsa-miR-novel-chrX_29247	hsa-mir-novel-chrX_29247	UUUUGCGAUGUGUUCCUAAU	-31	down		30

## Sheet: up.After-2_vs_Before-2
miRNA expression for After-2 vs Before-2 Fold change cutoff: 2.0 Column A: Mature miRNA, the mature miRNA name. Column B: Pre-miRNA, the pre-miRNA name. Column C: Sequence, the mature miRNA sequence. Column D: Fold change, fold change between two samples. Column E: Regulation, 'up' indicates up-regulation, and 'down' indicates down-regulation. Column F ~ G: Tag Counts (normalized), the normalized…
miRNA Information			Fold change & Regulation		Tag counts (normalized)
mature-miRNA	pre-miRNA	mature-sequence	Fold Change	Regulation	After-2	Before-2
hsa-miR-100-5p	hsa-mir-100	AACCCGUAGAUCCGAACUUGUG	5.3913	up	247	45
hsa-miR-106b-3p	hsa-mir-106b	CCGCACUGUGGGUACUUGCUGC	40	up	39
hsa-miR-10a-5p	hsa-mir-10a	UACCCUGUAGAUCCGAAUUUGUG	7.625	up	182	23
hsa-miR-126-3p	hsa-mir-126	UCGUACCGUGAGUAAUAAUGCG	3.68464	up	1366	370
hsa-miR-1268a	hsa-mir-1268a	CGGGCGUGGUGGUGGGGG	47	up	46
hsa-miR-127-3p	hsa-mir-127	UCGGAUCCGUCUGAGCUUGGCU	4.91667	up	117	23
hsa-miR-132-3p	hsa-mir-132	UAACAGUCUACAGCCAUGGUCG	21	up	20
hsa-miR-139-5p	hsa-mir-139	UCUACAGUGCACGUGUCUCCAGU	27	up	26
hsa-miR-181b-5p	hsa-mir-181b-1	AACAUUCAUUGCUGUCGGUGGGU	23	up	22
hsa-miR-181b-5p	hsa-mir-181b-2	AACAUUCAUUGCUGUCGGUGGGU	23	up	22
hsa-miR-181c-5p	hsa-mir-181c	AACAUUCAACCUGUCGGUGAGU	21	up	20
hsa-miR-18a-5p	hsa-mir-18a	UAAGGUGCAUCUAGUGCAGAUAG	3.3125	up	52	15
hsa-miR-21-3p	hsa-mir-21	CAACACCAGUCGAUGGGCUGU	21	up	20
hsa-miR-216b-5p	hsa-mir-216b	AAAUCUCUGCAGGCAAAUGUGA	27	up	26
hsa-miR-22-5p	hsa-mir-22	AGUUCUUCAGUGGCAAGCUUUA	2.75	up	65	23
hsa-miR-28-5p	hsa-mir-28	AAGGAGCUCACAGUCUAUUGAG	53	up	52
hsa-miR-30a-3p	hsa-mir-30a	CUUUCAGUCGGAUGUUUGCAGC	2.56522	up	117	45
hsa-miR-30b-5p	hsa-mir-30b	UGUAAACAUCCUACACUCAGCU	2.032	up	507	249
hsa-miR-3127-3p	hsa-mir-3127	UCCCCUUCUGCAGGCCUGCUGG	40	up	39
hsa-miR-330-5p	hsa-mir-330	UCUCUGGGCCUGUGUCUUAGGC	27	up	26
hsa-miR-339-5p	hsa-mir-339	UCCCUGUCCUCCAGGAGCUCACG	2.25862	up	130	57
hsa-miR-361-5p	hsa-mir-361	UUAUCAGAAUCUCCAGGGGUAC	2.96774	up	91	30
hsa-miR-378a-5p	hsa-mir-378a	CUCCUGACUCCAGGUCCUGUGU	13.875	up	221	15
hsa-miR-483-5p	hsa-mir-483	AAGACGGGAGGAAAGAAGGGAG	573	up	572
hsa-miR-484	hsa-mir-484	UCAGGCUCAGUCCCCUCCCGAU	2.54839	up	78	30
hsa-miR-490-3p	hsa-mir-490	CAACCUGGAGGACUCCAUGCUG	11.5385	up	449	38
hsa-miR-500a-3p	hsa-mir-500a	AUGCACCUGGGCAAGGAUUCUG	3.83333	up	91	23
hsa-miR-671-5p	hsa-mir-671	AGGAAGCCCUGGAGGGGCUGGAG	3.82759	up	221	57
hsa-miR-6846-5p	hsa-mir-6846	UGGGGGCUGGAUGGGGUAGAGU	53	up	52
hsa-miR-99a-5p	hsa-mir-99a	AACCCGUAGAUCCGAUCUUGUG	196	up	195
hsa-miR-99b-5p	hsa-mir-99b	CACCCGUAGAACCGACCUUGCG	5.13115	up	312	60
hsa-miR-novel-chr10_891	hsa-mir-novel-chr10_891	CUGGGACUGCAGUGGGUC	66	up	65
hsa-miR-novel-chr11_2017	hsa-mir-novel-chr11_2017	GCCCAGGGCUGAGGCGAGAGG	118	up	117
hsa-miR-novel-chr11_2136	hsa-mir-novel-chr11_2136	AGGCGGAGGUGGAGGGAG	118	up	117
hsa-miR-novel-chr11_2204	hsa-mir-novel-chr11_2204	AAGCUGCAGGCUGGAGGCUGCUG	66	up	65
hsa-miR-novel-chr11_2272	hsa-mir-novel-chr11_2272	UCUGGCUGAGGAGGAAGUGGA	157	up	156
hsa-miR-novel-chr11_2543	hsa-mir-novel-chr11_2543	CUGACCUAUGAAUUGACAGC	3.04396	up	553	181
hsa-miR-novel-chr12_3006	hsa-mir-novel-chr12_3006	AGGAGUGUGAGGAGCUGAAGGAAA	92	up	91
hsa-miR-novel-chr12_3625	hsa-mir-novel-chr12_3625	CGGAGCUGGGGGGUCCCUG	131	up	130
hsa-miR-novel-chr12_3956	hsa-mir-novel-chr12_3956	CUCUUCUGGGCUGUUCUUU	170	up	169
hsa-miR-novel-chr12_4116	hsa-mir-novel-chr12_4116	CUGAGGUCUGGAGUGGACGAUG	66	up	65
hsa-miR-novel-chr13_4647	hsa-mir-novel-chr13_4647	UCUGUGUGUUUGGGGCUGCUUUGU	144	up	143
hsa-miR-novel-chr16_7801	hsa-mir-novel-chr16_7801	AGGCCUGGGGGCUGAAGAGG	105	up	104
hsa-miR-novel-chr18_10018	hsa-mir-novel-chr18_10018	AGAGACUGGGGAGAAACC	27	up	26
hsa-miR-novel-chr18_9811	hsa-mir-novel-chr18_9811	GAAAGAGUGGGAGGAAGA	66	up	65
hsa-miR-novel-chr18_9923	hsa-mir-novel-chr18_9923	GGGGGCUGUAGGAUUCUCAGGUAG	79	up	78
hsa-miR-novel-chr19_10242	hsa-mir-novel-chr19_10242	GGGGCUGGCUGGGCAGGAGA	105	up	104
hsa-miR-novel-chr19_11108	hsa-mir-novel-chr19_11108	GGGAUGAAGGUGGAACUGG	144	up	143
hsa-miR-novel-chr19_11309	hsa-mir-novel-chr19_11309	AGGGCUGCAGAGAGGGAG	131	up	130
hsa-miR-novel-chr19_11538	hsa-mir-novel-chr19_11538	GCGGGGCCUGGUGGCGGCUG	118	up	117
hsa-miR-novel-chr1_12952	hsa-mir-novel-chr1_12952	GCUGGCCGGGCUGGCUGCG	79	up	78
hsa-miR-novel-chr1_13147	hsa-mir-novel-chr1_13147	GAGGUCUGGGAGGCUGGG	118	up	117
hsa-miR-novel-chr1_13400	hsa-mir-novel-chr1_13400	AGGAGGGGACGGCAGCACCA	92	up	91
hsa-miR-novel-chr1_13462	hsa-mir-novel-chr1_13462	CUGCCAGGGGAGCUCUGCUG	53	up	52
hsa-miR-novel-chr1_14144	hsa-mir-novel-chr1_14144	AGGGAAGGAGAGAGCCUG	92	up	91
hsa-miR-novel-chr20_14869	hsa-mir-novel-chr20_14869	AGAGGCUGGAGAGUCAAA	66	up	65
hsa-miR-novel-chr20_15216	hsa-mir-novel-chr20_15216	AGCCAGGCUCUGAAGGGAAA	27	up	26
hsa-miR-novel-chr22_16420	hsa-mir-novel-chr22_16420	GAAAGGAGAAGAAAAGGG	118	up	117
hsa-miR-novel-chr2_17173	hsa-mir-novel-chr2_17173	AAGAAGAGGAAGAAAGAGAGAGGAA	144	up	143
hsa-miR-novel-chr2_17520	hsa-mir-novel-chr2_17520	CUGCUGGGAGAACUGGAG	79	up	78
hsa-miR-novel-chr2_17891	hsa-mir-novel-chr2_17891	UGCGUGGGAGGAAGGACCAGGC	105	up	104
hsa-miR-novel-chr2_17948	hsa-mir-novel-chr2_17948	UGAGGAAGAAGAGGAUGGAAGG	53	up	52
hsa-miR-novel-chr2_18130	hsa-mir-novel-chr2_18130	UGGCUGGCCCGUGGGGCG	79	up	78
hsa-miR-novel-chr2_18305	hsa-mir-novel-chr2_18305	ACAGGAGUGGGGGGUGGGACGU	161	up	160
hsa-miR-novel-chr2_18306	hsa-mir-novel-chr2_18306	ACAGGAGUGGGGGGUGGGACGU	161	up	160
hsa-miR-novel-chr5_22142	hsa-mir-novel-chr5_22142	AAAGAACUUUGAAAAGAG	6	up	143	23
hsa-miR-novel-chr5_22400	hsa-mir-novel-chr5_22400	CUCUUCAGGAUCUGUGGGUAGC	92	up	91
hsa-miR-novel-chr5_22795	hsa-mir-novel-chr5_22795	AGUGAAACUGGAAAAUGAAACU	157	up	156
hsa-miR-novel-chr5_22853	hsa-mir-novel-chr5_22853	CCCGGGCUGGGCGCGAAGAGAGGA	131	up	130
hsa-miR-novel-chr5_22869	hsa-mir-novel-chr5_22869	GAGGAGAGAAGGGCUGGGG	105	up	104
hsa-miR-novel-chr5_23088	hsa-mir-novel-chr5_23088	GCUGGGGAGGUGAACUGGUG	66	up	65
hsa-miR-novel-chr6_23897	hsa-mir-novel-chr6_23897	UCUGGCUGAGGAGGAAGUGGA	157	up	156
hsa-miR-novel-chr6_23941	hsa-mir-novel-chr6_23941	GCUGGAGGGAGGCUGGGCG	105	up	104
hsa-miR-novel-chr7_24973	hsa-mir-novel-chr7_24973	CUGGGACUGCAGUGGGUC	66	up	65
hsa-miR-novel-chr7_25414	hsa-mir-novel-chr7_25414	AGGAAGCCCUGGAGGGGCUGGAGG	9.60194	up	988	102
hsa-miR-novel-chr7_25446	hsa-mir-novel-chr7_25446	GAAAAGGAGGAAGGGAUGGACAG	92	up	91
hsa-miR-novel-chr8_26363	hsa-mir-novel-chr8_26363	AAAAGCUGGGUUGAGAGG	55	up	54
hsa-miR-novel-chr8_26637	hsa-mir-novel-chr8_26637	UGGACCUCGGGGCUGGGGCUG	118	up	117
hsa-miR-novel-chr9_27273	hsa-mir-novel-chr9_27273	GGAGUAGGAGGCUGCGGAGA	131	up	130
hsa-miR-novel-chrX_28461	hsa-mir-novel-chrX_28461	CUGCCUCUUCGAGCUCCUGGGG	34	up	33
hsa-miR-novel-chrX_28471	hsa-mir-novel-chrX_28471	CCGGGGAGGAAAGGCUGGCG	21	up	20
hsa-miR-novel-chrX_28654	hsa-mir-novel-chrX_28654	CGGCGGGGGCGGCGCGCG	105	up	104
hsa-miR-novel-chrX_28914	hsa-mir-novel-chrX_28914	CUGCCUCUUCGAGCUCCUGGGG	34	up	33
hsa-miR-novel-chrY_29361	hsa-mir-novel-chrY_29361	CUGCCUCUUCGAGCUCCUGGGG	34	up	33
hsa-miR-novel-chrY_29371	hsa-mir-novel-chrY_29371	CCGGGGAGGAAAGGCUGGCG	21	up	20
hsa-miR-novel-chrY_29422	hsa-mir-novel-chrY_29422	CUGCCUCUUCGAGCUCCUGGGG	34	up	33

## Sheet: dn.After-2_vs_Before-2
miRNA expression for After-2 vs Before-2 Fold change cutoff: 2.0 Column A: Mature miRNA, the mature miRNA name. Column B: Pre-miRNA, the pre-miRNA name. Column C: Sequence, the mature miRNA sequence. Column D: Fold change, fold change between two samples. Column E: Regulation, 'up' indicates up-regulation, and 'down' indicates down-regulation. Column F ~ G: Tag Counts (normalized), the normalized…
miRNA Information			Fold Change & Regulation		Tag counts (normalized)
mature-miRNA	pre-miRNA	mature-sequence	Fold Change	Regulation	After-2	Before-2
hsa-let-7a-3p	hsa-let-7a-1	CUAUACAAUCUACUGUCUUUC	-12	down		11
hsa-let-7a-3p	hsa-let-7a-3	CUAUACAAUCUACUGUCUUUC	-12	down		11
hsa-let-7b-5p	hsa-let-7b	UGAGGUAGUAGGUUGUGUGGUU	-3.91656	down	754	2956
hsa-let-7e-5p	hsa-let-7e	UGAGGUAGGAGGUUGUAUAGUU	-107	down		106
hsa-miR-101-3p	hsa-mir-101-1	UACAGUACUGUGAUAACUGAA	-10.7681	down	137	1485
hsa-miR-101-3p	hsa-mir-101-2	UACAGUACUGUGAUAACUGAA	-10.7681	down	137	1485
hsa-miR-103a-3p	hsa-mir-103a-2	AGCAGCAUUGUACAGGGCUAUGA	-2.42328	down	377	915
hsa-miR-103a-3p	hsa-mir-103a-1	AGCAGCAUUGUACAGGGCUAUGA	-2.42328	down	377	915
hsa-miR-106b-5p	hsa-mir-106b	UAAAGUGCUGACAGUGCAGAU	-2.25926	down	26	60
hsa-miR-107	hsa-mir-107	AGCAGCAUUGUACAGGGCUAUCA	-31	down		30
hsa-miR-10b-5p	hsa-mir-10b	UACCCUGUAGAACCGAAUUUGUG	-12	down		11
hsa-miR-1224-5p	hsa-mir-1224	GUGAGGACUCGGGAGGUGG	-16	down		15
hsa-miR-1246	hsa-mir-1246	AAUGGAUUUUUGGAGCAGG	-24	down		23
hsa-miR-125b-5p	hsa-mir-125b-1	UCCCUGAGACCCUAACUUGUGA	-12	down		11
hsa-miR-125b-5p	hsa-mir-125b-2	UCCCUGAGACCCUAACUUGUGA	-12	down		11
hsa-miR-1273h-3p	hsa-mir-1273h	CUGCAGACUCGACCUCCCAGGC	-16	down		15
hsa-miR-1288-3p	hsa-mir-1288	UGGACUGCCCUGAUCUGGAGA	-16	down		15
hsa-miR-130a-3p	hsa-mir-130a	CAGUGCAAUGUUAAAAGGGCAU	-24	down		23
hsa-miR-130b-3p	hsa-mir-130b	CAGUGCAAUGAUGAAAGGGCAU	-16	down		15
hsa-miR-133a-3p	hsa-mir-133a-1	UUUGGUCCCCUUCAACCAGCUG	-14	down		13
hsa-miR-133a-3p	hsa-mir-133a-2	UUUGGUCCCCUUCAACCAGCUG	-14	down		13
hsa-miR-134-5p	hsa-mir-134	UGUGACUGGUUGACCAGAGGGG	-2.0125	down	559	1126
hsa-miR-144-3p	hsa-mir-144	UACAGUAUAGAUGAUGUACU	-61	down		60
hsa-miR-148a-5p	hsa-mir-148a	AAAGUUCUGAGACACUCCGACU	-77	down		76
hsa-miR-150-5p	hsa-mir-150	UCUCCCAACCCUUGUACCAGUG	-2.09362	down	234	491
hsa-miR-15a-5p	hsa-mir-15a	UAGCAGCACAUAAUGGUUUGUG	-99	down		98
hsa-miR-17-3p	hsa-mir-17	ACUGCAGUGAAGGCACUUGUAG	-39	down		38
hsa-miR-181a-3p	hsa-mir-181a-1	ACCAUCGACCGUUGAUUGUACC	-24	down		23
hsa-miR-182-5p	hsa-mir-182	UUUGGCAAUGGUAGAACUCACACU	-50	down		49
hsa-miR-194-5p	hsa-mir-194-1	UGUAACAGCAACUCCAUGUGGA	-27	down		26
hsa-miR-194-5p	hsa-mir-194-2	UGUAACAGCAACUCCAUGUGGA	-27	down		26
hsa-miR-195-5p	hsa-mir-195	UAGCAGCACAGAAAUAUUGGC	-16	down		15
hsa-miR-199a-3p	hsa-mir-199a-1	ACAGUAGUCUGCACAUUGGUUA	-3.01205	down	82	249
hsa-miR-199a-3p	hsa-mir-199a-2	ACAGUAGUCUGCACAUUGGUUA	-3.01205	down	82	249
hsa-miR-199a-5p	hsa-mir-199a-1	CCCAGUGUUCAGACUACCUGUUC	-54	down		53
hsa-miR-199a-5p	hsa-mir-199a-2	CCCAGUGUUCAGACUACCUGUUC	-54	down		53
hsa-miR-199b-3p	hsa-mir-199b	ACAGUAGUCUGCACAUUGGUUA	-3.01205	down	82	249
hsa-miR-199b-5p	hsa-mir-199b	CCCAGUGUUUAGACUAUCUGUUC	-73	down		72
hsa-miR-19a-3p	hsa-mir-19a	UGUGCAAAUCUAUGCAAAACUGA	-39	down		38
hsa-miR-19b-3p	hsa-mir-19b-1	UGUGCAAAUCCAUGCAAAACUGA	-2.575	down	39	102
hsa-miR-19b-3p	hsa-mir-19b-2	UGUGCAAAUCCAUGCAAAACUGA	-2.575	down	39	102
hsa-miR-200b-3p	hsa-mir-200b	UAAUACUGCCUGGUAAUGAUGA	-16	down		15
hsa-miR-200c-3p	hsa-mir-200c	UAAUACUGCCGGGUAAUGAUGGA	-31	down		30
hsa-miR-20b-5p	hsa-mir-20b	CAAAGUGCUCAUAGUGCAGGUAG	-46	down		45
hsa-miR-210-3p	hsa-mir-210	CUGUGCGUGUGACAGCGGCUGA	-4.65	down	39	185
hsa-miR-2110	hsa-mir-2110	UUGGGGAAACGGCCGCUGAGUG	-160	down		159
hsa-miR-222-3p	hsa-mir-222	AGCUACAUCUGGCUACUGGGU	-24	down		23
hsa-miR-223-3p	hsa-mir-223	UGUCAGUUUGUCAAAUACCCCA	-2.42717	down	507	1232
hsa-miR-2355-3p	hsa-mir-2355	AUUGUCCUUGCUGUUUGGAGAU	-16	down		15
hsa-miR-25-5p	hsa-mir-25	AGGCGGAGACUUGGGCAAUUG	-39	down		38
hsa-miR-28-3p	hsa-mir-28	CACUAGAUUGUGAGCUCCUGGA	-6.48148	down	26	174
hsa-miR-296-3p	hsa-mir-296	GAGGGUUGGGUGGAGGCUCUCC	-16	down		15
hsa-miR-3150b-3p	hsa-mir-3150b	UGAGGAGAUCGUCGAGGUUGG	-16	down		15
hsa-miR-320b	hsa-mir-320b-1	AAAAGCUGGGUUGAGAGGGCAA	-24	down		23
hsa-miR-320b	hsa-mir-320b-2	AAAAGCUGGGUUGAGAGGGCAA	-24	down		23
hsa-miR-320d	hsa-mir-320d-1	AAAAGCUGGGUUGAGAGGA	-20	down		19
hsa-miR-320d	hsa-mir-320d-2	AAAAGCUGGGUUGAGAGGA	-20	down		19
hsa-miR-330-3p	hsa-mir-330	GCAAAGCACACGGCCUGCAGAGA	-16	down		15
hsa-miR-339-3p	hsa-mir-339	UGAGCGCCUCGACGACAGAGCCG	-54	down		53
hsa-miR-340-3p	hsa-mir-340	UCCGUCUCAGUUACUUUAUAGC	-24	down		23
hsa-miR-340-5p	hsa-mir-340	UUAUAAAGCAAUGAGACUGAUU	-3.12214	down	130	408
hsa-miR-342-3p	hsa-mir-342	UCUCACACAGAAAUCGCACCCGU	-16	down		15
hsa-miR-361-3p	hsa-mir-361	UCCCCCAGGUGUGAUUCUGAUUU	-16	down		15
hsa-miR-3613-5p	hsa-mir-3613	UGUUGUACUUUUUUUUUUGUUC	-130	down		129
hsa-miR-370-3p	hsa-mir-370	GCCUGCUGGGGUGGAACCUGGU	-198	down		197
hsa-miR-374a-3p	hsa-mir-374a	CUUAUCAGAUUGUAUUGUAAUU	-39	down		38
hsa-miR-374a-5p	hsa-mir-374a	UUAUAAUACAACCUGAUAAGUG	-77	down		76
hsa-miR-379-5p	hsa-mir-379	UGGUAGACUAUGGAACGUAGG	-16	down		15
hsa-miR-381-3p	hsa-mir-381	UAUACAAGGGCAAGCUCUCUGU	-16	down		15
hsa-miR-382-5p	hsa-mir-382	GAAGUUGUUCGUGGUGGAUUCG	-31	down		30
hsa-miR-4430	hsa-mir-4430	AGGCUGGAGUGAGCGGAG	-16	down		15
hsa-miR-4470	hsa-mir-4470	UGGCAAACGUGGAAGCCGAGA	-46	down		45
hsa-miR-4508	hsa-mir-4508	GCGGGGCUGGGCGCGCG	-39	down		38
hsa-miR-451a	hsa-mir-451a	AAACCGUUACCAUUACUGAGUU	-3.54331	down	507	1799
hsa-miR-452-5p	hsa-mir-452	AACUGUUUGCAGAGGAAACUGA	-16	down		15
hsa-miR-4677-3p	hsa-mir-4677	UCUGUGAGACCAAAGAACUACU	-16	down		15
hsa-miR-4750-5p	hsa-mir-4750	CUCGGGCGGAGGUGGUUGAGUG	-31	down		30
hsa-miR-493-3p	hsa-mir-493	UGAAGGUCUACUGUGUGCCAGG	-16	down		15
hsa-miR-495-3p	hsa-mir-495	AAACAAACAUGGUGCACUUCUU	-24	down		23
hsa-miR-501-3p	hsa-mir-501	AAUGCACCCGGGCAAGGAUUCU	-24	down		23
hsa-miR-502-3p	hsa-mir-502	AAUGCACCUGGGCAAGGAUUCA	-24	down		23
hsa-miR-532-5p	hsa-mir-532	CAUGCCUUGAGUGUAGGACCGU	-5.125	down	39	204
hsa-miR-542-3p	hsa-mir-542	UGUGACAGAUUGAUAACUGAAA	-43	down		42
hsa-miR-574-3p	hsa-mir-574	CACGCUCAUGCACACACCCACA	-46	down		45
hsa-miR-576-3p	hsa-mir-576	AAGAUGUGGAAAAAUUGGAAUC	-24	down		23
hsa-miR-629-5p	hsa-mir-629	UGGGUUUACGUUGGGAGAACU	-7.83333	down	59	469
hsa-miR-6515-5p	hsa-mir-6515	UUGGAGGGUGUGGAAGACAUC	-69	down		68
hsa-miR-652-3p	hsa-mir-652	AAUGGCGCCACUAGGGUUGUG	-30.2476	down	104	3175
hsa-miR-6842-3p	hsa-mir-6842	UUGGCUGGUCUCUGCUCCGCAG	-24	down		23
hsa-miR-769-5p	hsa-mir-769	UGAGACCUCUGGGUUCUGAGCU	-20	down		19
hsa-miR-7845-5p	hsa-mir-7845	AAGGGACAGGGAGGGUCGUGG	-16	down		15
hsa-miR-889-3p	hsa-mir-889	UUAAUAUCGGACAACCAUUGU	-31	down		30
hsa-miR-9-5p	hsa-mir-9-1	UCUUUGGUUAUCUAGCUGUAUGA	-14	down		13
hsa-miR-9-5p	hsa-mir-9-2	UCUUUGGUUAUCUAGCUGUAUGA	-14	down		13
hsa-miR-9-5p	hsa-mir-9-3	UCUUUGGUUAUCUAGCUGUAUGA	-14	down		13
hsa-miR-941	hsa-mir-941-1	CACCCGGCUGUGUGCACAUGUGC	-13	down		12
hsa-miR-941	hsa-mir-941-2	CACCCGGCUGUGUGCACAUGUGC	-13	down		12
hsa-miR-941	hsa-mir-941-3	CACCCGGCUGUGUGCACAUGUGC	-13	down		12
hsa-miR-941	hsa-mir-941-4	CACCCGGCUGUGUGCACAUGUGC	-13	down		12
hsa-miR-941	hsa-mir-941-5	CACCCGGCUGUGUGCACAUGUGC	-13	down		12
hsa-miR-95-3p	hsa-mir-95	UUCAACGGGUAUUUAUUGAGCA	-24	down		23
hsa-miR-novel-chr11_1837	hsa-mir-novel-chr11_1837	CGGGCGGGGGCGGGAGGG	-46	down		45
hsa-miR-novel-chr11_2206	hsa-mir-novel-chr11_2206	UUCAGGUCUUGGAGACAAAU	-31	down		30
hsa-miR-novel-chr14_5271	hsa-mir-novel-chr14_5271	GAAGCUCAGAGGGCUCUGAUUC	-69	down		68
hsa-miR-novel-chr14_5418	hsa-mir-novel-chr14_5418	ACUCCAUGGGCUUUGGACCUUGG	-77	down		76
hsa-miR-novel-chr15_6643	hsa-mir-novel-chr15_6643	UGGGUUUACGUUGGGAGAACUU	-17.2075	down	52	911
hsa-miR-novel-chr17_9199	hsa-mir-novel-chr17_9199	UGGGAUGAGAAGGAUGUG	-24	down		23
hsa-miR-novel-chr18_10094	hsa-mir-novel-chr18_10094	AAGUUCCGGAAGGGAGGCUG	-24	down		23
hsa-miR-novel-chr19_10425	hsa-mir-novel-chr19_10425	ACCAUCGACCGUUGAGUGGAC	-16	down		15
hsa-miR-novel-chr19_10726	hsa-mir-novel-chr19_10726	UGAGACCUCUGGGUUCUGAG	-8.9542	down	130	1172
hsa-miR-novel-chr1_14381	hsa-mir-novel-chr1_14381	AACAUUCAUUGCUGUCGGUGG	-21	down		20
hsa-miR-novel-chr21_16083	hsa-mir-novel-chr21_16083	GCGCUGGCGGUGUGGACGCGGA	-24	down		23
hsa-miR-novel-chr22_16369	hsa-mir-novel-chr22_16369	AGCUGCUGGUCUGGAAACUCAGU	-16	down		15
hsa-miR-novel-chr2_17350	hsa-mir-novel-chr2_17350	AUCCUAGCUUGCCUGAGACUG	-12	down		11
hsa-miR-novel-chr2_17910	hsa-mir-novel-chr2_17910	GGAGGAGGAGCUGGAGA	-31	down		30
hsa-miR-novel-chr2_18007	hsa-mir-novel-chr2_18007	AGGGCUGGGCCGGGCGGG	-31	down		30
hsa-miR-novel-chr3_19732	hsa-mir-novel-chr3_19732	AAAGCAGGAUUCAGACUACA	-16	down		15
hsa-miR-novel-chr6_23423	hsa-mir-novel-chr6_23423	CUGAGUGUGGGACCUCUG	-16	down		15
hsa-miR-novel-chr7_25437	hsa-mir-novel-chr7_25437	UGGAAUGGCCUGAAGGUGGA	-16	down		15
hsa-miR-novel-chr7_25563	hsa-mir-novel-chr7_25563	AGGGCUGUGGGGCAGGGA	-39	down		38
hsa-miR-novel-chr7_26019	hsa-mir-novel-chr7_26019	UUUGGCAAUGGUAGAACUCACA	-69	down		68
hsa-miR-novel-chrX_28480	hsa-mir-novel-chrX_28480	AUCCUAGCUUGCCUGAGACUG	-12	down		11
hsa-miR-novel-chrX_29044	hsa-mir-novel-chrX_29044	AGCUACAUUGUCUGCUGGGUUUCA	-16	down		15
hsa-miR-novel-chrX_29247	hsa-mir-novel-chrX_29247	UUUUGCGAUGUGUUCCUAAU	-14	down		13

## Sheet: up.After-3_vs_Before-3
miRNA expression for After-3 vs Before-3 Fold change cutoff: 2.0 Column A: Mature miRNA, the mature miRNA name. Column B: Pre-miRNA, the pre-miRNA name. Column C: Sequence, the mature miRNA sequence. Column D: Fold change, fold change between two samples. Column E: Regulation, 'up' indicates up-regulation, and 'down' indicates down-regulation. Column F ~ G: Tag Counts (normalized), the normalized…
miRNA Information			Fold change & Regulation		Tag counts (normalized)
mature-miRNA	pre-miRNA	mature-sequence	Fold Change	Regulation	After-3	Before-3
hsa-let-7a-5p	hsa-let-7a-1	UGAGGUAGUAGGUUGUAUAGUU	8.49624	up	2259	265
hsa-let-7a-5p	hsa-let-7a-2	UGAGGUAGUAGGUUGUAUAGUU	8.49624	up	2259	265
hsa-let-7a-5p	hsa-let-7a-3	UGAGGUAGUAGGUUGUAUAGUU	8.49624	up	2259	265
hsa-let-7c-5p	hsa-let-7c	UGAGGUAGUAGGUUGUAUGGUU	6.68902	up	1096	163
hsa-let-7d-5p	hsa-let-7d	AGAGGUAGUAGGUUGCAUAGUU	4.71831	up	1674	354
hsa-let-7e-5p	hsa-let-7e	UGAGGUAGGAGGUUGUAUAGUU	7.58333	up	90	11
hsa-let-7f-5p	hsa-let-7f-1	UGAGGUAGUAGAUUGUAUAGUU	11.6136	up	7664	659
hsa-let-7f-5p	hsa-let-7f-2	UGAGGUAGUAGAUUGUAUAGUU	11.6136	up	7664	659
hsa-let-7g-5p	hsa-let-7g	UGAGGUAGUAGUUUGUACAGUU	3.49811	up	16643	4757
hsa-miR-1-3p	hsa-mir-1-2	UGGAAUGUAAAGAAGUAUGUAU	8.86577	up	1320	148
hsa-miR-1-3p	hsa-mir-1-1	UGGAAUGUAAAGAAGUAUGUAU	8.86577	up	1320	148
hsa-miR-10b-5p	hsa-mir-10b	UACCCUGUAGAACCGAAUUUGUG	3.27273	up	35	10
hsa-miR-122-5p	hsa-mir-122	UGGAGUGUGACAAUGGUGUUUG	4.44527	up	5969	1342
hsa-miR-125b-5p	hsa-mir-125b-1	UCCCUGAGACCCUAACUUGUGA	4.33333	up	25	5
hsa-miR-125b-5p	hsa-mir-125b-2	UCCCUGAGACCCUAACUUGUGA	4.33333	up	25	5
hsa-miR-126-5p	hsa-mir-126	CAUUAUUACUUUUGGUACGCG	19.4359	up	757	38
hsa-miR-127-3p	hsa-mir-127	UCGGAUCCGUCUGAGCUUGGCU	4.2	up	20	4
hsa-miR-128-3p	hsa-mir-128-1	UCACAGUGAACCGGUCUCUUU	6.31897	up	732	115
hsa-miR-128-3p	hsa-mir-128-2	UCACAGUGAACCGGUCUCUUU	6.31897	up	732	115
hsa-miR-130a-3p	hsa-mir-130a	CAGUGCAAUGUUAAAAGGGCAU	3.64286	up	50	13
hsa-miR-133a-3p	hsa-mir-133a-1	UUUGGUCCCCUUCAACCAGCUG	12.6667	up	37	2
hsa-miR-133a-3p	hsa-mir-133a-2	UUUGGUCCCCUUCAACCAGCUG	12.6667	up	37	2
hsa-miR-134-5p	hsa-mir-134	UGUGACUGGUUGACCAGAGGGG	9.77922	up	1505	153
hsa-miR-140-5p	hsa-mir-140	CAGUGGUUUUACCCUAUGGUAG	3.41445	up	897	262
hsa-miR-148a-3p	hsa-mir-148a	UCAGUGCACUACAGAACUUUGU	3.3831	up	22094	6530
hsa-miR-148b-3p	hsa-mir-148b	UCAGUGCAUCACAGAACUUUGU	5.17516	up	1624	313
hsa-miR-151a-5p	hsa-mir-151a	UCGAGGAGCUCACAGUCUAGU	16	up	15
hsa-miR-15a-5p	hsa-mir-15a	UAGCAGCACAUAAUGGUUUGUG	5.29412	up	179	33
hsa-miR-15b-3p	hsa-mir-15b	CGAAUCAUUAUUUGCUGCUCUA	2.1	up	20	9
hsa-miR-15b-5p	hsa-mir-15b	UAGCAGCACAUCAUGGUUUACA	5.16129	up	159	30
hsa-miR-16-5p	hsa-mir-16-1	UAGCAGCACGUAAAUAUUGGCG	2.29412	up	1091	475
hsa-miR-16-5p	hsa-mir-16-2	UAGCAGCACGUAAAUAUUGGCG	2.29412	up	1091	475
hsa-miR-17-3p	hsa-mir-17	ACUGCAGUGAAGGCACUUGUAG	2.77273	up	60	21
hsa-miR-17-5p	hsa-mir-17	CAAAGUGCUUACAGUGCAGGUAG	3.26655	up	1923	588
hsa-miR-181a-3p	hsa-mir-181a-1	ACCAUCGACCGUUGAUUGUACC	2.06667	up	30	14
hsa-miR-181c-5p	hsa-mir-181c	AACAUUCAACCUGUCGGUGAGU	3.2	up	15	4
hsa-miR-181d-5p	hsa-mir-181d	AACAUUCAUUGUUGUCGGUGGGU	14	up	55	3
hsa-miR-184	hsa-mir-184	UGGACGGAGAACUGAUAAGGGU	31	up	30
hsa-miR-18a-5p	hsa-mir-18a	UAAGGUGCAUCUAGUGCAGAUAG	2.89286	up	80	27
hsa-miR-191-5p	hsa-mir-191	CAACGGAAUCCCAAAAGCAGCUG	2.13306	up	11012	5162
hsa-miR-1910-3p	hsa-mir-1910	GAGGCAGAAGCAGGAUGACA	6.83333	up	40	5
hsa-miR-192-5p	hsa-mir-192	CUGACCUAUGAAUUGACAGCC	5.05298	up	762	150
hsa-miR-193a-5p	hsa-mir-193a	UGGGUCUUUGCGGGCGAGAUGA	8.62069	up	249	28
hsa-miR-193b-3p	hsa-mir-193b	AACUGGCCCUCAAAGUCCCGCU	2.625	up	20	7
hsa-miR-194-5p	hsa-mir-194-1	UGUAACAGCAACUCCAUGUGGA	2	up	15	7
hsa-miR-194-5p	hsa-mir-194-2	UGUAACAGCAACUCCAUGUGGA	2	up	15	7
hsa-miR-199a-3p	hsa-mir-199a-1	ACAGUAGUCUGCACAUUGGUUA	9.70833	up	465	47
hsa-miR-199a-3p	hsa-mir-199a-2	ACAGUAGUCUGCACAUUGGUUA	9.70833	up	465	47
hsa-miR-199b-3p	hsa-mir-199b	ACAGUAGUCUGCACAUUGGUUA	9.70833	up	465	47
hsa-miR-19a-3p	hsa-mir-19a	UGUGCAAAUCUAUGCAAAACUGA	12.5	up	149	11
hsa-miR-19b-3p	hsa-mir-19b-1	UGUGCAAAUCCAUGCAAAACUGA	3.43373	up	284	82
hsa-miR-19b-3p	hsa-mir-19b-2	UGUGCAAAUCCAUGCAAAACUGA	3.43373	up	284	82
hsa-miR-200a-3p	hsa-mir-200a	UAACACUGUCUGGUAACGAUGU	4.55556	up	40	8
hsa-miR-200b-3p	hsa-mir-200b	UAAUACUGCCUGGUAAUGAUGA	71	up	70
hsa-miR-203a-3p	hsa-mir-203a	GUGAAAUGUUUAGGACCACUAG	3.2	up	15	4
hsa-miR-205-5p	hsa-mir-205	UCCUUCAUUCCACCGGAGUCUG	16	up	15
hsa-miR-206	hsa-mir-206	UGGAAUGUAAGGAAGUGUGUGG	11.0208	up	528	47
hsa-miR-20a-5p	hsa-mir-20a	UAAAGUGCUUAUAGUGCAGGUAG	4.70588	up	3119	662
hsa-miR-21-5p	hsa-mir-21	UAGCUUAUCAGACUGAUGUUGA	2.72881	up	15616	5722
hsa-miR-210-3p	hsa-mir-210	CUGUGCGUGUGACAGCGGCUGA	2.26027	up	164	72
hsa-miR-25-3p	hsa-mir-25	CAUUGCACUUGUCUCGGUCUGA	2.81777	up	4375	1552
hsa-miR-26a-5p	hsa-mir-26a-1	UUCAAGUAAUCCAGGAUAGGCU	5.13317	up	10753	2094
hsa-miR-26a-5p	hsa-mir-26a-2	UUCAAGUAAUCCAGGAUAGGCU	5.13317	up	10753	2094
hsa-miR-26b-5p	hsa-mir-26b	UUCAAGUAAUUCAGGAUAGGU	5.2963	up	857	161
hsa-miR-27a-3p	hsa-mir-27a	UUCACAGUGGCUAAGUUCCGC	6.26446	up	757	120
hsa-miR-27b-3p	hsa-mir-27b	UUCACAGUGGCUAAGUUCUGC	4.08227	up	2232	546
hsa-miR-29c-3p	hsa-mir-29c	UAGCACCAUUUGAAAUCGGUUA	3.4	up	50	14
hsa-miR-30a-3p	hsa-mir-30a	CUUUCAGUCGGAUGUUUGCAGC	9.1	up	90	9
hsa-miR-30a-5p	hsa-mir-30a	UGUAAACAUCCUCGACUGGAAG	6.11207	up	708	115
hsa-miR-30b-5p	hsa-mir-30b	UGUAAACAUCCUACACUCAGCU	3.77358	up	399	105
hsa-miR-30c-5p	hsa-mir-30c-2	UGUAAACAUCCUACACUCUCAGC	5.72464	up	394	68
hsa-miR-30c-5p	hsa-mir-30c-1	UGUAAACAUCCUACACUCUCAGC	5.72464	up	394	68
hsa-miR-30e-3p	hsa-mir-30e	CUUUCAGUCGGAUGUUUACAGC	2.7	up	269	99
hsa-miR-3120-3p	hsa-mir-3120	CACAGCAAGUGUAGACAGGCA	31	up	30
hsa-miR-320a-3p	hsa-mir-320a	AAAAGCUGGGUUGAGAGGGCGA	11.9722	up	141462	11815
hsa-miR-328-3p	hsa-mir-328	CUGGCCCUCUCUGCCCUUCCGU	6.76471	up	229	33
hsa-miR-330-5p	hsa-mir-330	UCUCUGGGCCUGUGUCUUAGGC	21	up	20
hsa-miR-335-5p	hsa-mir-335	UCAAGAGCAAUAACGAAAAAUGU	21	up	20
hsa-miR-339-5p	hsa-mir-339	UCCCUGUCCUCCAGGAGCUCACG	6.3125	up	100	15
hsa-miR-33a-5p	hsa-mir-33a	GUGCAUUGUAGUUGCAUUGCA	31	up	30
hsa-miR-340-3p	hsa-mir-340	UCCGUCUCAGUUACUUUAUAGC	21	up	20
hsa-miR-340-5p	hsa-mir-340	UUAUAAAGCAAUGAGACUGAUU	2.01024	up	588	292
hsa-miR-361-5p	hsa-mir-361	UUAUCAGAAUCUCCAGGGGUAC	2.44	up	60	24
hsa-miR-3613-5p	hsa-mir-3613	UGUUGUACUUUUUUUUUUGUUC	6.13043	up	140	22
hsa-miR-365a-3p	hsa-mir-365a	UAAUGCCCCUAAAAAUCCUUAU	16	up	15
hsa-miR-365b-3p	hsa-mir-365b	UAAUGCCCCUAAAAAUCCUUAU	16	up	15
hsa-miR-374a-3p	hsa-mir-374a	CUUAUCAGAUUGUAUUGUAAUU	51	up	50
hsa-miR-374a-5p	hsa-mir-374a	UUAUAAUACAACCUGAUAAGUG	53.3333	up	159	2
hsa-miR-374b-5p	hsa-mir-374b	AUAUAAUACAACCUGCUAAGUG	4.44	up	110	24
hsa-miR-375-3p	hsa-mir-375	UUUGUUCGUUCGGCUCGCGUGA	20.25	up	80	3
hsa-miR-378d	hsa-mir-378d-2	ACUGGACUUGGAGUCAGAAA	2	up	45	22
hsa-miR-378d	hsa-mir-378d-1	ACUGGACUUGGAGUCAGAAA	2	up	45	22
hsa-miR-378f	hsa-mir-378f	ACUGGACUUGGAGCCAGAAG	5.25	up	20	3
hsa-miR-424-5p	hsa-mir-424	CAGCAGCAAUUCAUGUUUUGAA	21	up	20
hsa-miR-450a-5p	hsa-mir-450a-1	UUUUGCGAUGUGUUCCUAAUAU	10.25	up	40	3
hsa-miR-450a-5p	hsa-mir-450a-2	UUUUGCGAUGUGUUCCUAAUAU	10.25	up	40	3
hsa-miR-450b-5p	hsa-mir-450b	UUUUGCAAUAUGUUCCUGAAUA	41	up	40
hsa-miR-455-5p	hsa-mir-455	UAUGUGCCUUUGGACUACAUCG	18.8889	up	169	8
hsa-miR-483-5p	hsa-mir-483	AAGACGGGAGGAAAGAAGGGAG	4.42857	up	30	6
hsa-miR-484	hsa-mir-484	UCAGGCUCAGUCCCCUCCCGAU	3.21053	up	60	18
hsa-miR-486-5p	hsa-mir-486-1	UCCUGUACUGAGCUGCCCCGAG	2.09545	up	1382	659
hsa-miR-486-5p	hsa-mir-486-2	UCCUGUACUGAGCUGCCCCGAG	2.09545	up	1382	659
hsa-miR-490-3p	hsa-mir-490	CAACCUGGAGGACUCCAUGCUG	22.5	up	179	7
hsa-miR-493-5p	hsa-mir-493	UUGUACAUGGUAGGCUUUCAUU	31	up	30
hsa-miR-499a-5p	hsa-mir-499a	UUAAGACUUGCAGUGAUGUUU	4.5	up	35	7
hsa-miR-505-5p	hsa-mir-505	GGGAGCCAGGAAGUAUUGAUGU	7	up	20	2
hsa-miR-509-3-5p	hsa-mir-509-3	UACUGCAGACGUGGCAAUCAUG	10.25	up	40	3
hsa-miR-548e-3p	hsa-mir-548e	AAAAACUGAGACUACUUUUGCA	2.1	up	20	9
hsa-miR-590-3p	hsa-mir-590	UAAUUUUAUGUAUAAGCUAGU	16	up	15
hsa-miR-625-3p	hsa-mir-625	GACUAUAGAACUUUCCCCCUCA	5.33333	up	15	2
hsa-miR-651-5p	hsa-mir-651	UUUAGGAUAAGCUUGACUUUUG	5.16667	up	30	5
hsa-miR-659-5p	hsa-mir-659	AGGACCUUCCCUGAACCAAGGA	21	up	20
hsa-miR-664a-3p	hsa-mir-664a	UAUUCAUUUAUCCCCAGCCUACA	23.6667	up	70	2
hsa-miR-6741-5p	hsa-mir-6741	GUGGGUGCUGGUGGGAGCCGUG	5.25	up	20	3
hsa-miR-889-3p	hsa-mir-889	UUAAUAUCGGACAACCAUUGU	21	up	20
hsa-miR-92a-3p	hsa-mir-92a-1	UAUUGCACUUGUCCCGGCCUGU	5.2648	up	1689	320
hsa-miR-92a-3p	hsa-mir-92a-2	UAUUGCACUUGUCCCGGCCUGU	5.2648	up	1689	320
hsa-miR-92b-3p	hsa-mir-92b	UAUUGCACUCGUCCCGGCCUCC	5.25	up	20	3
hsa-miR-939-5p	hsa-mir-939	UGGGGAGCUGAGGCUCUGGGGGUG	41	up	40
hsa-miR-96-5p	hsa-mir-96	UUUGGCACUAGCACAUUUUUGCU	3.875	up	30	7
hsa-miR-98-5p	hsa-mir-98	UGAGGUAGUAAGUUGUAUUGUU	4.85714	up	135	27
hsa-miR-novel-chr10_1124	hsa-mir-novel-chr10_1124	ACUCGGCGUGGCGUCGGUCGUGG	2.05697	up	1046	508
hsa-miR-novel-chr10_143	hsa-mir-novel-chr10_143	CAAGGACUGCAAUUACUUUUGC	61	up	60
hsa-miR-novel-chr14_5243	hsa-mir-novel-chr14_5243	UGGGCCAGAUGAAGUGGGAAC	31	up	30
hsa-miR-novel-chr14_5271	hsa-mir-novel-chr14_5271	GAAGCUCAGAGGGCUCUGAUUC	4.2	up	20	4
hsa-miR-novel-chr15_6553	hsa-mir-novel-chr15_6553	GGGGCUGGAGAGAUGGC	13.1	up	130	9
hsa-miR-novel-chr17_8597	hsa-mir-novel-chr17_8597	CUGGGAUGAGAUGAGACUGGAG	31	up	30
hsa-miR-novel-chr17_9261	hsa-mir-novel-chr17_9261	UACCCUGUAGAUCCGAAUUUGU	5.92857	up	663	111
hsa-miR-novel-chr18_10018	hsa-mir-novel-chr18_10018	AGAGACUGGGGAGAAACC	31	up	30
hsa-miR-novel-chr20_14983	hsa-mir-novel-chr20_14983	UUGGUCCCCUUCAACCAGCUGU	7.1875	up	229	31
hsa-miR-novel-chr2_17080	hsa-mir-novel-chr2_17080	AGGGAGAUGAAGAGGAC	41	up	40
hsa-miR-novel-chr2_17233	hsa-mir-novel-chr2_17233	UGGGAGAAAAGAAAGGGG	31	up	30
hsa-miR-novel-chr2_17740	hsa-mir-novel-chr2_17740	UACCCUGUAGAACCGAAUUUGU	9.12766	up	857	93
hsa-miR-novel-chr2_18595	hsa-mir-novel-chr2_18595	AAGGGCAGGGACUGCACGGG	31	up	30
hsa-miR-novel-chr5_21721	hsa-mir-novel-chr5_21721	AGAGCUGGGGAAGACGCUG	21	up	20
hsa-miR-novel-chr5_22142	hsa-mir-novel-chr5_22142	AAAGAACUUUGAAAAGAG	61	up	60
hsa-miR-novel-chr6_23941	hsa-mir-novel-chr6_23941	GCUGGAGGGAGGCUGGGCG	31	up	30
hsa-miR-novel-chr7_25414	hsa-mir-novel-chr7_25414	AGGAAGCCCUGGAGGGGCUGGAGG	3.13514	up	115	36
hsa-miR-novel-chr8_26363	hsa-mir-novel-chr8_26363	AAAAGCUGGGUUGAGAGG	2.42857	up	16	6
hsa-miR-novel-chr9_27483	hsa-mir-novel-chr9_27483	UGGGGCUGUGGUGGCCAGA	31	up	30
hsa-miR-novel-chr9_28240	hsa-mir-novel-chr9_28240	ACAGUAGUCUGCACAUUGGUU	2.78169	up	394	141
hsa-miR-novel-chrX_29247	hsa-mir-novel-chrX_29247	UUUUGCGAUGUGUUCCUAAU	2.66667	up	23	8

## Sheet: dn.After-3_vs_Before-3
miRNA expression for After-3 vs Before-3 Fold change cutoff: 2.0 Column A: Mature miRNA, the mature miRNA name. Column B: Pre-miRNA, the pre-miRNA name. Column C: Sequence, the mature miRNA sequence. Column D: Fold change, fold change between two samples. Column E: Regulation, 'up' indicates up-regulation, and 'down' indicates down-regulation. Column F ~ G: Tag Counts (normalized), the normalized…
miRNA Information			Fold Change & Regulation		Tag counts (normalized)
mature-miRNA	pre-miRNA	mature-sequence	Fold Change	Regulation	After-3	Before-3
hsa-let-7g-3p	hsa-let-7g	CUGUACAGGCCACUGCCUUGC	-7	down		6
hsa-miR-100-5p	hsa-mir-100	AACCCGUAGAUCCGAACUUGUG	-3.78049	down	40	154
hsa-miR-101-3p	hsa-mir-101-1	UACAGUACUGUGAUAACUGAA	-3.6499	down	1450	5295
hsa-miR-101-3p	hsa-mir-101-2	UACAGUACUGUGAUAACUGAA	-3.6499	down	1450	5295
hsa-miR-10392-5p	hsa-mir-10392	GCGCUUCGACGGGCUGGGCUGUG	-4	down		3
hsa-miR-10395-3p	hsa-mir-10395	AUGUAUUCGUACUGUCUGAUG	-41	down		40
hsa-miR-10399-5p	hsa-mir-10399	AAUUACAGAUUGUCUCAGAGA	-29	down		28
hsa-miR-103a-2-5p	hsa-mir-103a-2	AGCUUCUUUACAGUGCUGCCUUG	-11	down		10
hsa-miR-103a-3p	hsa-mir-103a-2	AGCAGCAUUGUACAGGGCUAUGA	-2.52781	down	1545	3907
hsa-miR-103a-3p	hsa-mir-103a-1	AGCAGCAUUGUACAGGGCUAUGA	-2.52781	down	1545	3907
hsa-miR-10527-5p	hsa-mir-10527	AAAGCAAAUGUUGGGUGAACGGC	-11	down		10
hsa-miR-106a-5p	hsa-mir-106a	AAAAGUGCUUACAGUGCAGGUAG	-16	down		15
hsa-miR-107	hsa-mir-107	AGCAGCAUUGUACAGGGCUAUCA	-10	down		9
hsa-miR-10a-5p	hsa-mir-10a	UACCCUGUAGAUCCGAAUUUGUG	-2.23077	down	25	57
hsa-miR-11400	hsa-mir-11400	UCGGCUGUGUAUCUCUGUGUC	-20	down		19
hsa-miR-1180-3p	hsa-mir-1180	UUUCCGGCUCGCGUGGGUGUGU	-10	down		9
hsa-miR-1185-1-3p	hsa-mir-1185-1	AUAUACAGGGGGAGACUCUUAU	-7	down		6
hsa-miR-1246	hsa-mir-1246	AAUGGAUUUUUGGAGCAGG	-6.28571	down	20	131
hsa-miR-1249-3p	hsa-mir-1249	ACGCCCUUCCCCCCCUUCUUCA	-3	down		2
hsa-miR-1250-5p	hsa-mir-1250	ACGGUGCUGGAUGUGGCCUUU	-98	down		97
hsa-miR-1255a	hsa-mir-1255a	AGGAUGAGCAAAGAAAGUAGAUU	-6	down		5
hsa-miR-125a-5p	hsa-mir-125a	UCCCUGAGACCCUUUAACCUGUGA	-3	down		2
hsa-miR-1260b	hsa-mir-1260b	AUCCCACCACUGCCACCAU	-3	down		2
hsa-miR-1268a	hsa-mir-1268a	CGGGCGUGGUGGUGGGGG	-8	down		7
hsa-miR-1273h-3p	hsa-mir-1273h	CUGCAGACUCGACCUCCCAGGC	-17	down		16
hsa-miR-1273h-5p	hsa-mir-1273h	CUGGGAGGUCAAGGCUGCAGU	-9	down		8
hsa-miR-1285-3p	hsa-mir-1285-1	UCUGGGCAACAAAGUGAGACCU	-16	down		15
hsa-miR-1285-3p	hsa-mir-1285-2	UCUGGGCAACAAAGUGAGACCU	-16	down		15
hsa-miR-1287-5p	hsa-mir-1287	UGCUGGAUCAGUGGUUCGAGUC	-6	down		5
hsa-miR-1288-3p	hsa-mir-1288	UGGACUGCCCUGAUCUGGAGA	-4	down		3
hsa-miR-129-5p	hsa-mir-129-1	CUUUUUGCGGUCUGGGCUUGC	-3	down		2
hsa-miR-129-5p	hsa-mir-129-2	CUUUUUGCGGUCUGGGCUUGC	-3	down		2
hsa-miR-1291	hsa-mir-1291	UGGCCCUGACUGAAGACCAGCAGU	-4	down		3
hsa-miR-1294	hsa-mir-1294	UGUGAGGUUGGCAUUGUUGUCU	-4	down		3
hsa-miR-1299	hsa-mir-1299	UUCUGGAAUUCUGUGUGAGGGA	-3	down		2
hsa-miR-1301-3p	hsa-mir-1301	UUGCAGCUGCCUGGGAGUGACUUC	-9	down		8
hsa-miR-1304-5p	hsa-mir-1304	UUUGAGGCUACAGUGAGAUGUG	-8	down		7
hsa-miR-1306-3p	hsa-mir-1306	ACGUUGGCUCUGGUGGUG	-3	down		2
hsa-miR-1307-3p	hsa-mir-1307	ACUCGGCGUGGCGUCGGUCGUG	-3.7541	down	60	228
hsa-miR-1307-5p	hsa-mir-1307	UCGACCGGACCUCGACCGGCU	-3.83607	down	60	233
hsa-miR-130a-5p	hsa-mir-130a	GCUCUUUUCACAUUGUGCUACU	-7	down		6
hsa-miR-130b-3p	hsa-mir-130b	CAGUGCAAUGAUGAAAGGGCAU	-7	down		6
hsa-miR-130b-5p	hsa-mir-130b	ACUCUUUCCCUGUUGCACUAC	-3	down		2
hsa-miR-1322	hsa-mir-1322	GAUGAUGCUGCUGAUGCUG	-3	down		2
hsa-miR-136-3p	hsa-mir-136	CAUCAUCGUCUCAAAUGAGUCU	-4	down		3
hsa-miR-139-3p	hsa-mir-139	UGGAGACGCGGCCCUGUUGGAGU	-28	down		27
hsa-miR-143-3p	hsa-mir-143	UGAGAUGAAGCACUGUAGCUC	-2.73895	down	8645	23680
hsa-miR-144-5p	hsa-mir-144	GGAUAUCAUCAUAUACUGUAAG	-4	down		3
hsa-miR-146a-5p	hsa-mir-146a	UGAGAACUGAAUUCCAUGGGUU	-2.36005	down	2432	5741
hsa-miR-146b-3p	hsa-mir-146b	GCCCUGUGGACUCAGUUCUGGU	-370	down		369
hsa-miR-146b-5p	hsa-mir-146b	UGAGAACUGAAUUCCAUAGGCUG	-23.6227	down	977	23102
hsa-miR-148a-5p	hsa-mir-148a	AAAGUUCUGAGACACUCCGACU	-30.1429	down	20	632
hsa-miR-150-5p	hsa-mir-150	UCUCCCAACCCUUGUACCAGUG	-2.27938	down	518	1182
hsa-miR-155-5p	hsa-mir-155	UUAAUGCUAAUCGUGAUAGGGGUU	-25	down		24
hsa-miR-16-1-3p	hsa-mir-16-1	CCAGUAUUAACUGUGCUGCUGA	-10	down		9
hsa-miR-181a-2-3p	hsa-mir-181a-2	ACCACUGACCGUUGACUGUACC	-18	down		17
hsa-miR-181a-5p	hsa-mir-181a-2	AACAUUCAACGCUGUCGGUGAGU	-3.00885	down	112	339
hsa-miR-181a-5p	hsa-mir-181a-1	AACAUUCAACGCUGUCGGUGAGU	-3.00885	down	112	339
hsa-miR-182-5p	hsa-mir-182	UUUGGCAAUGGUAGAACUCACACU	-3.46154	down	25	89
hsa-miR-183-5p	hsa-mir-183	UAUGGCACUGGUAGAAUUCACU	-2.97561	down	40	121
hsa-miR-185-5p	hsa-mir-185	UGGAGAGAAAGGCAGUUCCUGA	-4.22989	down	1565	6623
hsa-miR-186-5p	hsa-mir-186	CAAAGAAUUCUCCUUUUGGGCU	-3.3048	down	478	1582
hsa-miR-18a-3p	hsa-mir-18a	ACUGCCCUAAGUGCUCCUUCUGG	-9	down		8
hsa-miR-1908-5p	hsa-mir-1908	CGGCGGGGACGGCGAUUGGUC	-3	down		2
hsa-miR-193a-3p	hsa-mir-193a	AACUGGCCUACAAAGUCCCAGU	-15	down		14
hsa-miR-197-3p	hsa-mir-197	UUCACCACCUUCUCCACCCAGC	-127	down		126
hsa-miR-1976	hsa-mir-1976	CCUCCUGCCCUCCUUGCUGU	-3	down		2
hsa-miR-199a-5p	hsa-mir-199a-1	CCCAGUGUUCAGACUACCUGUUC	-2.88235	down	135	391
hsa-miR-199a-5p	hsa-mir-199a-2	CCCAGUGUUCAGACUACCUGUUC	-2.88235	down	135	391
hsa-miR-21-3p	hsa-mir-21	CAACACCAGUCGAUGGGCUGU	-422	down		421
hsa-miR-2110	hsa-mir-2110	UUGGGGAAACGGCCGCUGAGUG	-2.4878	down	40	101
hsa-miR-2115-3p	hsa-mir-2115	CAUCAGAAUUCAUGGAGGCUAG	-12	down		11
hsa-miR-2115-5p	hsa-mir-2115	AGCUUCCAUGACUCCUGAUGGA	-13	down		12
hsa-miR-214-5p	hsa-mir-214	UGCCUGUCUACACUUGCUGUGC	-4	down		3
hsa-miR-218-5p	hsa-mir-218-1	UUGUGCUUGAUCUAACCAUGU	-5	down		4
hsa-miR-218-5p	hsa-mir-218-2	UUGUGCUUGAUCUAACCAUGU	-5	down		4
hsa-miR-219a-1-3p	hsa-mir-219a-1	AGAGUUGAGUCUGGACGUCCCG	-3	down		2
hsa-miR-219b-3p	hsa-mir-219b	AGAAUUGCGUUUGGACAAUCAGU	-3	down		2
hsa-miR-22-3p	hsa-mir-22	AAGCUGCCAGUUGAAGAACUGU	-2.91462	down	5621	16385
hsa-miR-22-5p	hsa-mir-22	AGUUCUUCAGUGGCAAGCUUUA	-14	down		13
hsa-miR-2355-3p	hsa-mir-2355	AUUGUCCUUGCUGUUUGGAGAU	-52	down		51
hsa-miR-2355-5p	hsa-mir-2355	AUCCCCAGAUACAAUGGACAA	-7	down		6
hsa-miR-23a-3p	hsa-mir-23a	AUCACAUUGCCAGGGAUUUCC	-4.60805	down	1415	6524
hsa-miR-23b-3p	hsa-mir-23b	AUCACAUUGCCAGGGAUUACCAC	-31	down		30
hsa-miR-24-3p	hsa-mir-24-1	UGGCUCAGUUCAGCAGGAACAG	-3.44331	down	1560	5374
hsa-miR-24-3p	hsa-mir-24-2	UGGCUCAGUUCAGCAGGAACAG	-3.44331	down	1560	5374
hsa-miR-25-5p	hsa-mir-25	AGGCGGAGACUUGGGCAAUUG	-114	down		113
hsa-miR-27a-5p	hsa-mir-27a	AGGGCUUAGCUGCUUGUGAGCA	-522	down		521
hsa-miR-27b-5p	hsa-mir-27b	AGAGCUUAGCUGAUUGGUGAAC	-17	down		16
hsa-miR-28-3p	hsa-mir-28	CACUAGAUUGUGAGCUCCUGGA	-4.17	down	299	1250
hsa-miR-29b-2-5p	hsa-mir-29b-2	CUGGUUUCACAUGGUGGCUUAG	-4	down		3
hsa-miR-29b-3p	hsa-mir-29b-1	UAGCACCAUUUGAAAUCAGUGUU	-10	down		9
hsa-miR-29b-3p	hsa-mir-29b-2	UAGCACCAUUUGAAAUCAGUGUU	-10	down		9
hsa-miR-29c-5p	hsa-mir-29c	UGACCGAUUUCUCCUGGUGUUC	-8	down		7
hsa-miR-3124-5p	hsa-mir-3124	UUCGCGGGCGAAGGCAAAGUC	-3	down		2
hsa-miR-3127-5p	hsa-mir-3127	AUCAGGGCUUGUGGAAUGGGAAG	-3	down		2
hsa-miR-3146	hsa-mir-3146	CAUGCUAGGAUAGAAAGAAUGG	-3	down		2
hsa-miR-3158-3p	hsa-mir-3158-1	AAGGGCUUCCUCUCUGCAGGAC	-4	down		3
hsa-miR-3158-3p	hsa-mir-3158-2	AAGGGCUUCCUCUCUGCAGGAC	-4	down		3
hsa-miR-3164	hsa-mir-3164	UGUGACUUUAAGGGAAAUGGCG	-4	down		3
hsa-miR-3165	hsa-mir-3165	AGGUGGAUGCAAUGUGACCUCA	-3	down		2
hsa-miR-3173-5p	hsa-mir-3173	UGCCCUGCCUGUUUUCUCCUUU	-3	down		2
hsa-miR-3176	hsa-mir-3176	ACUGGCCUGGGACUACCGG	-6	down		5
hsa-miR-3177-3p	hsa-mir-3177	UGCACGGCACUGGGGACACGU	-19	down		18
hsa-miR-3192-5p	hsa-mir-3192	UCUGGGAGGUUGUAGCAGUGGAA	-3	down		2
hsa-miR-3198	hsa-mir-3198-1	GUGGAGUCCUGGGGAAUGGAGA	-10	down		9
hsa-miR-3198	hsa-mir-3198-2	GUGGAGUCCUGGGGAAUGGAGA	-10	down		9
hsa-miR-320b	hsa-mir-320b-1	AAAAGCUGGGUUGAGAGGGCAA	-3	down		2
hsa-miR-320b	hsa-mir-320b-2	AAAAGCUGGGUUGAGAGGGCAA	-3	down		2
hsa-miR-320c	hsa-mir-320c-1	AAAAGCUGGGUUGAGAGGGU	-3	down		2
hsa-miR-320c	hsa-mir-320c-2	AAAAGCUGGGUUGAGAGGGU	-3	down		2
hsa-miR-320d	hsa-mir-320d-1	AAAAGCUGGGUUGAGAGGA	-4	down		3
hsa-miR-320d	hsa-mir-320d-2	AAAAGCUGGGUUGAGAGGA	-4	down		3
hsa-miR-324-5p	hsa-mir-324	CGCAUCCCCUAGGGCAUUGGUG	-199	down		198
hsa-miR-326	hsa-mir-326	CCUCUGGGCCCUUCCUCCAG	-15	down		14
hsa-miR-330-3p	hsa-mir-330	GCAAAGCACACGGCCUGCAGAGA	-43	down		42
hsa-miR-331-3p	hsa-mir-331	GCCCCUGGGCCUAUCCUAGAA	-7	down		6
hsa-miR-338-3p	hsa-mir-338	UCCAGCAUCAGUGAUUUUGUUG	-6	down		5
hsa-miR-338-5p	hsa-mir-338	AACAAUAUCCUGGUGCUGAGUG	-3	down		2
hsa-miR-339-3p	hsa-mir-339	UGAGCGCCUCGACGACAGAGCCG	-108	down		107
hsa-miR-342-3p	hsa-mir-342	UCUCACACAGAAAUCGCACCCGU	-19	down		18
hsa-miR-342-5p	hsa-mir-342	AGGGGUGCUAUCUGUGAUUGA	-24	down		23
hsa-miR-345-5p	hsa-mir-345	GCUGACUCCUAGUCCAGGGCUC	-39	down		38
hsa-miR-34a-5p	hsa-mir-34a	UGGCAGUGUCUUAGCUGGUUGU	-7	down		6
hsa-miR-34c-5p	hsa-mir-34c	AGGCAGUGUAGUUAGCUGAUUGC	-12	down		11
hsa-miR-361-3p	hsa-mir-361	UCCCCCAGGUGUGAUUCUGAUUU	-2.7561	down	40	112
hsa-miR-3611	hsa-mir-3611	UUGUGAAGAAAGAAAUUCUUA	-3	down		2
hsa-miR-3615	hsa-mir-3615	UCUCUCGGCUCCUCGCGGCUC	-8	down		7
hsa-miR-3617-3p	hsa-mir-3617	CAUCAGCACCCUAUGUCCUUUCU	-4	down		3
hsa-miR-3617-5p	hsa-mir-3617	AAAGACAUAGUUGCAAGAUGGG	-6	down		5
hsa-miR-362-3p	hsa-mir-362	AACACACCUAUUCAAGGAUUCA	-9	down		8
hsa-miR-362-5p	hsa-mir-362	AAUCCUUGGAACCUAGGUGUGAGU	-10	down		9
hsa-miR-363-3p	hsa-mir-363	AAUUGCACGGUAUCCAUCUGUA	-5.43137	down	50	276
hsa-miR-369-5p	hsa-mir-369	AGAUCGACCGUGUUAUAUUCGC	-3	down		2
hsa-miR-3690	hsa-mir-3690-1	ACCUGGACCCAGCGUAGACAAAG	-3	down		2
hsa-miR-3690	hsa-mir-3690-2	ACCUGGACCCAGCGUAGACAAAG	-3	down		2
hsa-miR-370-3p	hsa-mir-370	GCCUGCUGGGGUGGAACCUGGU	-158	down		157
hsa-miR-376c-3p	hsa-mir-376c	AACAUAGAGGAAAUUCCACGU	-6	down		5
hsa-miR-378a-3p	hsa-mir-378a	ACUGGACUUGGAGUCAGAAGGC	-3.94963	down	2143	8467
hsa-miR-378e	hsa-mir-378e	ACUGGACUUGGAGUCAGGA	-4	down		3
hsa-miR-378g	hsa-mir-378g	ACUGGGCUUGGAGUCAGAAG	-3	down		2
hsa-miR-379-5p	hsa-mir-379	UGGUAGACUAUGGAACGUAGG	-2.16129	down	30	66
hsa-miR-381-3p	hsa-mir-381	UAUACAAGGGCAAGCUCUCUGU	-3.04762	down	20	63
hsa-miR-3918	hsa-mir-3918	ACAGGGCCGCAGAUGGAGACU	-8	down		7
hsa-miR-3928-3p	hsa-mir-3928	GGAGGAACCUUGGAGCUUCGGC	-10	down		9
hsa-miR-3934-5p	hsa-mir-3934	UCAGGUGUGGAAACUGAGGCAG	-5	down		4
hsa-miR-409-3p	hsa-mir-409	GAAUGUUGCUCGGUGAACCCCU	-15	down		14
hsa-miR-421	hsa-mir-421	AUCAACAGACAUUAAUUGGGCGC	-3	down		2
hsa-miR-423-5p	hsa-mir-423	UGAGGGGCAGAGAGCGAGACUUU	-2.00994	down	1106	2224
hsa-miR-424-3p	hsa-mir-424	CAAAACGUGAGGCGCUGCUAU	-4	down		3
hsa-miR-425-3p	hsa-mir-425	AUCGGGAAUGUCGUGUCCGCCC	-24	down		23
hsa-miR-4286	hsa-mir-4286	ACCCCACUCCUGGUACC	-24	down		23
hsa-miR-432-5p	hsa-mir-432	UCUUGGAGUAGGUCAUUGGGUGG	-6	down		5
hsa-miR-4443	hsa-mir-4443	UUGGAGGCGUGGGUUUU	-3	down		2
hsa-miR-4446-3p	hsa-mir-4446	CAGGGCUGGCAGUGACAUGGGU	-7	down		6
hsa-miR-4477b	hsa-mir-4477b	AUUAAGGACAUUUGUGAUUGAU	-6	down		5
hsa-miR-4489	hsa-mir-4489	UGGGGCUAGUGAUGCAGGACG	-10	down		9
hsa-miR-4504	hsa-mir-4504	UGUGACAAUAGAGAUGAACAUG	-19	down		18
hsa-miR-4505	hsa-mir-4505	AGGCUGGGCUGGGACGGA	-4	down		3
hsa-miR-4508	hsa-mir-4508	GCGGGGCUGGGCGCGCG	-10	down		9
hsa-miR-451a	hsa-mir-451a	AAACCGUUACCAUUACUGAGUU	-2.03107	down	1415	2875
hsa-miR-452-5p	hsa-mir-452	AACUGUUUGCAGAGGAAACUGA	-4	down		3
hsa-miR-4645-3p	hsa-mir-4645	AGACAGUAGUUCUUGCCUGGUU	-4	down		3
hsa-miR-4654	hsa-mir-4654	UGUGGGAUCUGGAGGCAUCUGG	-3	down		2
hsa-miR-4664-3p	hsa-mir-4664	CUUCCGGUCUGUGAGCCCCGUC	-6	down		5
hsa-miR-4665-5p	hsa-mir-4665	CUGGGGGACGCGUGAGCGCGAGC	-3	down		2
hsa-miR-4669	hsa-mir-4669	UGUGUCCGGGAAGUGGAGGAGG	-4	down		3
hsa-miR-4676-5p	hsa-mir-4676	GAGCCAGUGGUGAGACAGUGA	-7	down		6
hsa-miR-4677-3p	hsa-mir-4677	UCUGUGAGACCAAAGAACUACU	-3	down		2
hsa-miR-4700-5p	hsa-mir-4700	UCUGGGGAUGAGGACAGUGUGU	-4	down		3
hsa-miR-4746-5p	hsa-mir-4746	CCGGUCCCAGGAGAACCUGCAGA	-3	down		2
hsa-miR-4772-3p	hsa-mir-4772	CCUGCAACUUUGCCUGAUCAGA	-14	down		13
hsa-miR-4772-5p	hsa-mir-4772	UGAUCAGGCAAAAUUGCAGACU	-86	down		85
hsa-miR-4791	hsa-mir-4791	UGGAUAUGAUGACUGAAA	-6	down		5
hsa-miR-486-3p	hsa-mir-486-1	CGGGGCAGCUCAGUACAGGAU	-4	down		3
hsa-miR-486-3p	hsa-mir-486-2	CGGGGCAGCUCAGUACAGGAU	-4	down		3
hsa-miR-491-5p	hsa-mir-491	AGUGGGGAACCCUUCCAUGAGG	-9	down		8
hsa-miR-493-3p	hsa-mir-493	UGAAGGUCUACUGUGUGCCAGG	-19	down		18
hsa-miR-495-3p	hsa-mir-495	AAACAAACAUGGUGCACUUCUU	-4	down		3
hsa-miR-500a-3p	hsa-mir-500a	AUGCACCUGGGCAAGGAUUCUG	-4.74194	down	30	146
hsa-miR-501-3p	hsa-mir-501	AAUGCACCCGGGCAAGGAUUCU	-2.19355	down	30	67
hsa-miR-502-3p	hsa-mir-502	AAUGCACCUGGGCAAGGAUUCA	-4.60976	down	40	188
hsa-miR-503-5p	hsa-mir-503	UAGCAGCGGGAACAGUUCUGCAG	-6	down		5
hsa-miR-505-3p	hsa-mir-505	CGUCAACACUUGCUGGUUUCCU	-10	down		9
hsa-miR-511-3p	hsa-mir-511	AAUGUGUAGCAAAAGACAGA	-3	down		2
hsa-miR-511-5p	hsa-mir-511	GUGUCUUUUGCUCUGCAGUCA	-9	down		8
hsa-miR-5187-5p	hsa-mir-5187	UGGGAUGAGGGAUUGAAGUGGA	-6	down		5
hsa-miR-532-5p	hsa-mir-532	CAUGCCUUGAGUGUAGGACCGU	-10.1348	down	140	1428
hsa-miR-539-3p	hsa-mir-539	AUCAUACAAGGACAAUUUCUUU	-3	down		2
hsa-miR-542-3p	hsa-mir-542	UGUGACAGAUUGAUAACUGAAA	-3.43902	down	40	140
hsa-miR-542-5p	hsa-mir-542	UCGGGGAUCAUCAUGUCACGAGA	-4	down		3
hsa-miR-548ah-3p	hsa-mir-548ah	CAAAAACUGCAGUUACUUUUGC	-3	down		2
hsa-miR-548an	hsa-mir-548an	AAAAGGCAUUGUGGUUUUUG	-8	down		7
hsa-miR-548ar-3p	hsa-mir-548ar	UAAAACUGCAGUUAUUUUUGC	-3	down		2
hsa-miR-548bc	hsa-mir-548bc	AAAAACUGUGAUUACUUUUGC	-12	down		11
hsa-miR-548j-3p	hsa-mir-548j	CAAAAACUGCAUUACUUUUGC	-10	down		9
hsa-miR-548j-5p	hsa-mir-548j	AAAAGUAAUUGCGGUCUUUGGU	-3	down		2
hsa-miR-548k	hsa-mir-548k	AAAAGUACUUGCGGAUUUUGCU	-4	down		3
hsa-miR-548o-3p	hsa-mir-548o	CCAAAACUGCAGUUACUUUUGC	-5	down		4
hsa-miR-548o-3p	hsa-mir-548o-2	CCAAAACUGCAGUUACUUUUGC	-5	down		4
hsa-miR-551a	hsa-mir-551a	GCGACCCACUCUUGGUUUCCA	-8	down		7
hsa-miR-552-3p	hsa-mir-552	AACAGGUGACUGGUUAGACAA	-3	down		2
hsa-miR-574-5p	hsa-mir-574	UGAGUGUGUGUGUGUGAGUGUGU	-2.85714	down	20	59
hsa-miR-576-3p	hsa-mir-576	AAGAUGUGGAAAAAUUGGAAUC	-16.8095	down	20	352
hsa-miR-579-5p	hsa-mir-579	UCGCGGUUUGUGCCAGAUGACG	-4	down		3
hsa-miR-580-3p	hsa-mir-580	UUGAGAAUGAUGAAUCAUUAGG	-10	down		9
hsa-miR-582-3p	hsa-mir-582	UAACUGGUUGAACAACUGAACC	-58	down		57
hsa-miR-582-5p	hsa-mir-582	UUACAGUUGUUCAACCAGUUACU	-3	down		2
hsa-miR-584-5p	hsa-mir-584	UUAUGGUUUGCCUGGGACUGAG	-40	down		39
hsa-miR-589-5p	hsa-mir-589	UGAGAACCACGUCUGCUCUGAG	-58	down		57
hsa-miR-597-3p	hsa-mir-597	UGGUUCUCUUGUGGCUCAAGCGU	-3	down		2
hsa-miR-598-3p	hsa-mir-598	UACGUCAUCGUUGUCAUCGUCA	-3	down		2
hsa-miR-618	hsa-mir-618	AAACUCUACUUGUCCUUCUGAGU	-4	down		3
hsa-miR-625-5p	hsa-mir-625	AGGGGGAAAGUUCUAUAGUCC	-3	down		2
hsa-miR-628-5p	hsa-mir-628	AUGCUGACAUAUUUACUAGAGG	-3	down		2
hsa-miR-629-5p	hsa-mir-629	UGGGUUUACGUUGGGAGAACU	-11.0541	down	110	1226
hsa-miR-6501-5p	hsa-mir-6501	AGUUGCCAGGGCUGCCUUUGGU	-12	down		11
hsa-miR-6502-5p	hsa-mir-6502	AGCUCUAGAAAGAUUGUUGACC	-12	down		11
hsa-miR-6503-3p	hsa-mir-6503	GGGACUAGGAUGCAGACCUCC	-6	down		5
hsa-miR-6503-5p	hsa-mir-6503	AGGUCUGCAUUCAAAUCCCCAGA	-9	down		8
hsa-miR-6513-5p	hsa-mir-6513	UUUGGGAUUGACGCCACAUGUCU	-3	down		2
hsa-miR-6515-5p	hsa-mir-6515	UUGGAGGGUGUGGAAGACAUC	-10	down		9
hsa-miR-652-3p	hsa-mir-652	AAUGGCGCCACUAGGGUUGUG	-6.15508	down	747	4603
hsa-miR-654-5p	hsa-mir-654	UGGUGGGCCGCAGAACAUGUGC	-12	down		11
hsa-miR-660-5p	hsa-mir-660	UACCCAUUGCAUAUCGGAGUUG	-32	down		31
hsa-miR-671-3p	hsa-mir-671	UCCGGUUCUCAGGGCUCCACC	-6	down		5
hsa-miR-6753-3p	hsa-mir-6753	UGGUCUGUCUCUGCCCUGGCAC	-3	down		2
hsa-miR-6767-5p	hsa-mir-6767	UCGCAGACAGGGACACAUGGAGA	-4	down		3
hsa-miR-6793-3p	hsa-mir-6793	UCCCCAACCCCUGCCCGCAG	-7	down		6
hsa-miR-6813-5p	hsa-mir-6813	CAGGGGCUGGGGUUUCAGGUUCU	-6	down		5
hsa-miR-6842-3p	hsa-mir-6842	UUGGCUGGUCUCUGCUCCGCAG	-72	down		71
hsa-miR-6842-5p	hsa-mir-6842	UGGGGGUGGUCUCUAGCCAAGG	-3	down		2
hsa-miR-6847-5p	hsa-mir-6847	ACAGAGGACAGUGGAGUGUGAGC	-4	down		3
hsa-miR-6852-5p	hsa-mir-6852	CCCUGGGGUUCUGAGGACAUG	-42	down		41
hsa-miR-6853-3p	hsa-mir-6853	UGUUCAUUGGAACCCUGCGCAG	-3	down		2
hsa-miR-6866-5p	hsa-mir-6866	UUAGAGGCUGGAAUAGAGAUUCU	-9	down		8
hsa-miR-7-5p	hsa-mir-7-1	UGGAAGACUAGUGAUUUUGUUGUU	-3.06186	down	96	296
hsa-miR-7-5p	hsa-mir-7-2	UGGAAGACUAGUGAUUUUGUUGUU	-3.06186	down	96	296
hsa-miR-7-5p	hsa-mir-7-3	UGGAAGACUAGUGAUUUUGUUGUU	-3.06186	down	96	296
hsa-miR-744-3p	hsa-mir-744	CUGUUGCCACUAACCUCAACCU	-3	down		2
hsa-miR-744-5p	hsa-mir-744	UGCGGGGCUAGGGCUAACAGCA	-9.20625	down	159	1472
hsa-miR-766-3p	hsa-mir-766	ACUCCAGCCCCACAGCCUCAGC	-37	down		36
hsa-miR-766-5p	hsa-mir-766	AGGAGGAAUUGGUGCUGGUCUU	-3	down		2
hsa-miR-769-5p	hsa-mir-769	UGAGACCUCUGGGUUCUGAGCU	-16.3462	down	25	424
hsa-miR-7706	hsa-mir-7706	UGAAGCGCCUGUGCUCUGCCGAGA	-9	down		8
hsa-miR-7974	hsa-mir-7974	AGGCUGUGAUGCUCUCCUGAGCCC	-9	down		8
hsa-miR-874-3p	hsa-mir-874	CUGCCCUGGCCCGAGGGACCGA	-4	down		3
hsa-miR-9-5p	hsa-mir-9-1	UCUUUGGUUAUCUAGCUGUAUGA	-6	down		5
hsa-miR-9-5p	hsa-mir-9-2	UCUUUGGUUAUCUAGCUGUAUGA	-6	down		5
hsa-miR-9-5p	hsa-mir-9-3	UCUUUGGUUAUCUAGCUGUAUGA	-6	down		5
hsa-miR-92a-1-5p	hsa-mir-92a-1	AGGUUGGGAUCGGUUGCAAUGCU	-12	down		11
hsa-miR-92b-5p	hsa-mir-92b	AGGGACGGGACGCGGUGCAGUG	-8	down		7
hsa-miR-93-3p	hsa-mir-93	ACUGCUGAGCUAGCACUUCCCG	-4	down		3
hsa-miR-941	hsa-mir-941-1	CACCCGGCUGUGUGCACAUGUGC	-2.18182	down	32	71
hsa-miR-941	hsa-mir-941-2	CACCCGGCUGUGUGCACAUGUGC	-2.18182	down	32	71
hsa-miR-941	hsa-mir-941-3	CACCCGGCUGUGUGCACAUGUGC	-2.18182	down	32	71
hsa-miR-941	hsa-mir-941-4	CACCCGGCUGUGUGCACAUGUGC	-2.18182	down	32	71
hsa-miR-941	hsa-mir-941-5	CACCCGGCUGUGUGCACAUGUGC	-2.18182	down	32	71
hsa-miR-942-5p	hsa-mir-942	UCUUCUCUGUUUUGGCCAUGUG	-31	down		30
hsa-miR-99a-5p	hsa-mir-99a	AACCCGUAGAUCCGAUCUUGUG	-2.37037	down	80	191
hsa-miR-99b-3p	hsa-mir-99b	CAAGCUCGUGUCUGUGGGUCCG	-26	down		25
hsa-miR-99b-5p	hsa-mir-99b	CACCCGUAGAACCGACCUUGCG	-3.9901	down	100	402
hsa-miR-novel-chr10_1255	hsa-mir-novel-chr10_1255	UUCCUAUGCAUAUACUUCUUU	-3	down		2
hsa-miR-novel-chr10_1266	hsa-mir-novel-chr10_1266	UUCGGGCUGGCCUGCUGCUCCGGA	-3	down		2
hsa-miR-novel-chr10_142	hsa-mir-novel-chr10_142	AGCCUGGAAGCUGGAGCCUGCA	-6	down		5
hsa-miR-novel-chr10_25	hsa-mir-novel-chr10_25	CCUCCCACUGCAGAGCCUG	-4	down		3
hsa-miR-novel-chr10_472	hsa-mir-novel-chr10_472	UCAGGUCUUCAGACUGUGG	-10	down		9
hsa-miR-novel-chr10_490	hsa-mir-novel-chr10_490	AAGGGAAAGGUAAGAAGAAAUG	-7	down		6
hsa-miR-novel-chr10_724	hsa-mir-novel-chr10_724	ACCCCUUCGGCUGCUGGGCC	-7	down		6
hsa-miR-novel-chr11_1722	hsa-mir-novel-chr11_1722	UCCCUGCCCCAUGACCCCGACA	-4	down		3
hsa-miR-novel-chr11_1820	hsa-mir-novel-chr11_1820	AAAAGUACUUGCGGAUUUUG	-9	down		8
hsa-miR-novel-chr11_2096	hsa-mir-novel-chr11_2096	UUUGGGUGGGACAGACAGAAGACA	-6	down		5
hsa-miR-novel-chr11_2188	hsa-mir-novel-chr11_2188	CUGUGCGUGUGACAGCGGCUGAU	-15	down		14
hsa-miR-novel-chr11_2571	hsa-mir-novel-chr11_2571	GCAUUGGAGGCUUUGGCAAGGUGU	-4	down		3
hsa-miR-novel-chr11_2812	hsa-mir-novel-chr11_2812	AAUGUGGACUGGUGUGACC	-4	down		3
hsa-miR-novel-chr11_2881	hsa-mir-novel-chr11_2881	GAGGGGCAGAGAGCGAG	-13	down		12
hsa-miR-novel-chr12_3257	hsa-mir-novel-chr12_3257	GCACAUGUAAGCUGACUGAA	-6	down		5
hsa-miR-novel-chr12_3271	hsa-mir-novel-chr12_3271	GGUUCCAUAGUGUAGUGGU	-3	down		2
hsa-miR-novel-chr12_3797	hsa-mir-novel-chr12_3797	UCUCUUCCAGGGUGGCUCUCAAC	-4	down		3
hsa-miR-novel-chr12_3814	hsa-mir-novel-chr12_3814	CAGCUUUCUGUAGCAGAGAUCA	-6	down		5
hsa-miR-novel-chr12_3822	hsa-mir-novel-chr12_3822	CAGCUUUCUGUAGCAGAGAUCA	-6	down		5
hsa-miR-novel-chr13_4295	hsa-mir-novel-chr13_4295	GAGAGAGGUUGAUCUUGCUGU	-4	down		3
hsa-miR-novel-chr14_5395	hsa-mir-novel-chr14_5395	UGGGGCUGUGUCACUGUGGGU	-8	down		7
hsa-miR-novel-chr14_5476	hsa-mir-novel-chr14_5476	AACACAAGGUAUUGGUAUUAC	-3	down		2
hsa-miR-novel-chr14_5692	hsa-mir-novel-chr14_5692	CCGGAGUUGUAAGUGUUGACA	-6	down		5
hsa-miR-novel-chr14_5713	hsa-mir-novel-chr14_5713	GUGUUGCUGUGGAUGACGU	-4	down		3
hsa-miR-novel-chr15_6178	hsa-mir-novel-chr15_6178	ACCCGGGAGUAGGAGACUCAGA	-14	down		13
hsa-miR-novel-chr15_6254	hsa-mir-novel-chr15_6254	UGGGAAUGGAUUGAUUGG	-6	down		5
hsa-miR-novel-chr15_6361	hsa-mir-novel-chr15_6361	UGGGCCAGACUAAGCUGGGGC	-7	down		6
hsa-miR-novel-chr15_6455	hsa-mir-novel-chr15_6455	GCUGCAGGGAGGAGGGUG	-3	down		2
hsa-miR-novel-chr15_6459	hsa-mir-novel-chr15_6459	UUGCUGUGAUGAUGUUCUGAGCUC	-10	down		9
hsa-miR-novel-chr15_6643	hsa-mir-novel-chr15_6643	UGGGUUUACGUUGGGAGAACUU	-2.52505	down	538	1360
hsa-miR-novel-chr15_6683	hsa-mir-novel-chr15_6683	CCUUCCUGUGGGACUCAGGG	-4	down		3
hsa-miR-novel-chr15_6741	hsa-mir-novel-chr15_6741	UGUAGGCUGAUGUUGAUACUG	-9	down		8
hsa-miR-novel-chr16_6933	hsa-mir-novel-chr16_6933	CCUCAGGCUGUAAGUGCAGGCAGA	-12	down		11
hsa-miR-novel-chr16_6954	hsa-mir-novel-chr16_6954	GAGCUUGUCGGAUGUGCAGAUU	-7	down		6
hsa-miR-novel-chr16_7382	hsa-mir-novel-chr16_7382	AGGAGAGCUCUGGUGGCCCCU	-4	down		3
hsa-miR-novel-chr16_7412	hsa-mir-novel-chr16_7412	UCUGGGCACAGGCGGAUGGAC	-4	down		3
hsa-miR-novel-chr16_7734	hsa-mir-novel-chr16_7734	CAACUGAGGUGUGCGGGCUGG	-7	down		6
hsa-miR-novel-chr16_7808	hsa-mir-novel-chr16_7808	AGAGUGGGACUGAAGGUUAAGU	-6	down		5
hsa-miR-novel-chr16_7839	hsa-mir-novel-chr16_7839	GCAGGACGGUGGCCAUG	-12.45	down	319	3983
hsa-miR-novel-chr16_7844	hsa-mir-novel-chr16_7844	UGGAAGGGAUUGAAGACU	-4	down		3
hsa-miR-novel-chr17_8174	hsa-mir-novel-chr17_8174	CGGCCGCGGCGGAACCGG	-6	down		5
hsa-miR-novel-chr17_8235	hsa-mir-novel-chr17_8235	AUGCCCCUAAAAAUCCUUA	-3	down		2
hsa-miR-novel-chr17_8277	hsa-mir-novel-chr17_8277	ACUUGGGUGGUGGGACUGGAG	-3	down		2
hsa-miR-novel-chr17_8278	hsa-mir-novel-chr17_8278	ACUUGGGUGGUGGGACUGGAG	-3	down		2
hsa-miR-novel-chr17_8314	hsa-mir-novel-chr17_8314	UGGAGCCAGGCUGAGAAGGGGUG	-4	down		3
hsa-miR-novel-chr17_8327	hsa-mir-novel-chr17_8327	ACGUGGACUCCAGACUCUCUGUG	-10	down		9
hsa-miR-novel-chr17_8749	hsa-mir-novel-chr17_8749	AAGCCUGGGGAGGACUGUGGCA	-7	down		6
hsa-miR-novel-chr17_8960	hsa-mir-novel-chr17_8960	CAGGCCUGGCUGGGCUCCCUGGA	-11	down		10
hsa-miR-novel-chr17_9326	hsa-mir-novel-chr17_9326	UGCCUGGGAUAGGAAGUGAGG	-7	down		6
hsa-miR-novel-chr17_9375	hsa-mir-novel-chr17_9375	AGCAGGUCACGACUCAGG	-4	down		3
hsa-miR-novel-chr17_9421	hsa-mir-novel-chr17_9421	AAGAUGGCGGCUGAAGGCG	-11	down		10
hsa-miR-novel-chr18_10094	hsa-mir-novel-chr18_10094	AAGUUCCGGAAGGGAGGCUG	-3	down		2
hsa-miR-novel-chr18_9692	hsa-mir-novel-chr18_9692	CGGGCCAGGGCCGAGCGG	-4	down		3
hsa-miR-novel-chr18_9956	hsa-mir-novel-chr18_9956	CCAGGCUGCACCAGGCUGG	-6	down		5
hsa-miR-novel-chr19_10159	hsa-mir-novel-chr19_10159	UUGGAGGUUGUAGGACCGGCG	-8	down		7
hsa-miR-novel-chr19_10327	hsa-mir-novel-chr19_10327	AUGGUUUGGGUGUGAAUUCCGG	-11	down		10
hsa-miR-novel-chr19_10393	hsa-mir-novel-chr19_10393	ACAGAGGACAGCAGGCUG	-6	down		5
hsa-miR-novel-chr19_10404	hsa-mir-novel-chr19_10404	CGCAAGCGGCUGCGGAACCGGCUGG	-7	down		6
hsa-miR-novel-chr19_10422	hsa-mir-novel-chr19_10422	GUUCCUGCUGAACUGAGCCAGU	-3	down		2
hsa-miR-novel-chr19_10425	hsa-mir-novel-chr19_10425	ACCAUCGACCGUUGAGUGGAC	-35	down		34
hsa-miR-novel-chr19_11076	hsa-mir-novel-chr19_11076	CAUGCUGUGGUUGCUUUG	-8	down		7
hsa-miR-novel-chr19_11078	hsa-mir-novel-chr19_11078	CAUGCUGUGGUUGCUUUG	-8	down		7
hsa-miR-novel-chr19_11210	hsa-mir-novel-chr19_11210	GCCGGGACUGUGCCCAGGGCU	-4	down		3
hsa-miR-novel-chr19_11224	hsa-mir-novel-chr19_11224	CCUGCCUGUGUACCACUCC	-6	down		5
hsa-miR-novel-chr19_11567	hsa-mir-novel-chr19_11567	UGAGGAGGAUCUGAAGGAUUGG	-11	down		10
hsa-miR-novel-chr1_11665	hsa-mir-novel-chr1_11665	GCGAAGCGGUGGCUGGGCUG	-10	down		9
hsa-miR-novel-chr1_11715	hsa-mir-novel-chr1_11715	GCUGCAGGGAGGAGGGUG	-3	down		2
hsa-miR-novel-chr1_12864	hsa-mir-novel-chr1_12864	UCCUUCAUUCCACCGGAGUCU	-3	down		2
hsa-miR-novel-chr1_13193	hsa-mir-novel-chr1_13193	CCCGGGACUGGAGGGUGAGUGACGG	-4	down		3
hsa-miR-novel-chr1_13201	hsa-mir-novel-chr1_13201	UGGUCACUGCGAACGGGCA	-4	down		3
hsa-miR-novel-chr1_13277	hsa-mir-novel-chr1_13277	AGGAGCUGAAGGAGCUGAU	-3	down		2
hsa-miR-novel-chr1_13587	hsa-mir-novel-chr1_13587	GCCCGGACUGGCCGGAGGCGCG	-6	down		5
hsa-miR-novel-chr1_14120	hsa-mir-novel-chr1_14120	CAGCCUCUGCAGCUCCCCGG	-6	down		5
hsa-miR-novel-chr1_14398	hsa-mir-novel-chr1_14398	UUCAUGAGAGUUGGAUUCUCUG	-6	down		5
hsa-miR-novel-chr20_14682	hsa-mir-novel-chr20_14682	UUGUGAAUGGGGGAACAUAG	-10	down		9
hsa-miR-novel-chr20_14848	hsa-mir-novel-chr20_14848	CCCUGGAUGUACAGAUGAAG	-4	down		3
hsa-miR-novel-chr20_15063	hsa-mir-novel-chr20_15063	AAGGUCUCUCGCCGGGCUGGG	-10	down		9
hsa-miR-novel-chr20_15173	hsa-mir-novel-chr20_15173	ACCCUAGGUAGACUCCAG	-4	down		3
hsa-miR-novel-chr20_15318	hsa-mir-novel-chr20_15318	UGGACGUUUCUGGGGCCUCA	-4	down		3
hsa-miR-novel-chr21_15906	hsa-mir-novel-chr21_15906	UCUCUGGGCCUGUGUCUU	-4	down		3
hsa-miR-novel-chr21_16177	hsa-mir-novel-chr21_16177	ACCUGUAGGACUCAGAUGUG	-4	down		3
hsa-miR-novel-chr22_16470	hsa-mir-novel-chr22_16470	GAGCAGGCUCCGGGGGACAGG	-3	down		2
hsa-miR-novel-chr22_16514	hsa-mir-novel-chr22_16514	UGGGCUUUUUGAGAACAAGGACU	-4	down		3
hsa-miR-novel-chr22_16567	hsa-mir-novel-chr22_16567	UGCCUGGGCUGCGGUCGGGAG	-4	down		3
hsa-miR-novel-chr22_16632	hsa-mir-novel-chr22_16632	AUGACUGAGUGAAGUGCUU	-4	down		3
hsa-miR-novel-chr22_16646	hsa-mir-novel-chr22_16646	UGGGGGGCGGUGCUGGGGCCCAGA	-3	down		2
hsa-miR-novel-chr22_16838	hsa-mir-novel-chr22_16838	UCCUCGUCCCUCGGGCCCGUGGC	-7	down		6
hsa-miR-novel-chr22_16845	hsa-mir-novel-chr22_16845	AGGACCUUCCCUGAACCAAGG	-6	down		5
hsa-miR-novel-chr22_16881	hsa-mir-novel-chr22_16881	AUCUGUUCCCUGGGCUGGAAGUG	-8	down		7
hsa-miR-novel-chr2_17303	hsa-mir-novel-chr2_17303	CUCCGGGUUCUGUCACUGUG	-4	down		3
hsa-miR-novel-chr2_17314	hsa-mir-novel-chr2_17314	GGUGGGACUGGAAGCGUCAG	-8	down		7
hsa-miR-novel-chr2_17350	hsa-mir-novel-chr2_17350	AUCCUAGCUUGCCUGAGACUG	-23	down		22
hsa-miR-novel-chr2_17520	hsa-mir-novel-chr2_17520	CUGCUGGGAGAACUGGAG	-6	down		5
hsa-miR-novel-chr2_18242	hsa-mir-novel-chr2_18242	CGACUGGGCGAGUGGAGGCUCC	-8	down		7
hsa-miR-novel-chr2_18413	hsa-mir-novel-chr2_18413	UCUCCGCCACCUCCACCGCGGCU	-3	down		2
hsa-miR-novel-chr2_18414	hsa-mir-novel-chr2_18414	UCUCCGCCACCUCCACCGCGGCU	-3	down		2
hsa-miR-novel-chr2_18987	hsa-mir-novel-chr2_18987	AGGGCUGGACUCAGCGGCGGAGC	-3	down		2
hsa-miR-novel-chr2_19021	hsa-mir-novel-chr2_19021	AUGAGCCUGUGGCUUUGAGGACG	-9	down		8
hsa-miR-novel-chr3_19123	hsa-mir-novel-chr3_19123	GGGGAAGAAUGAAUGAGGA	-6	down		5
hsa-miR-novel-chr3_19235	hsa-mir-novel-chr3_19235	AACUGUGGAGUGAGAAG	-8	down		7
hsa-miR-novel-chr3_19276	hsa-mir-novel-chr3_19276	CUCAGAGGAGCUGGCAGAG	-4	down		3
hsa-miR-novel-chr3_19732	hsa-mir-novel-chr3_19732	AAAGCAGGAUUCAGACUACA	-17	down		16
hsa-miR-novel-chr3_19740	hsa-mir-novel-chr3_19740	CCCUUGGACUUUUGCUGAAGUG	-17	down		16
hsa-miR-novel-chr3_19865	hsa-mir-novel-chr3_19865	AACUGCUGGAACCCACUGAGC	-19	down		18
hsa-miR-novel-chr3_19892	hsa-mir-novel-chr3_19892	GGGGCCGAGGGAGCGAG	-8	down		7
hsa-miR-novel-chr3_19975	hsa-mir-novel-chr3_19975	AUUCCCAGGGAAGUGCUCUGAU	-4	down		3
hsa-miR-novel-chr3_20007	hsa-mir-novel-chr3_20007	ACGAACUGCAAGGUCUGAAGU	-8	down		7
hsa-miR-novel-chr3_20315	hsa-mir-novel-chr3_20315	GGGCAUACUCGUAGACCUUGCCUGA	-6	down		5
hsa-miR-novel-chr4_20569	hsa-mir-novel-chr4_20569	GUGGCACUGGGAAUGUGG	-8	down		7
hsa-miR-novel-chr4_20606	hsa-mir-novel-chr4_20606	ACUUUGUGUGAGGACUUUGGU	-36	down		35
hsa-miR-novel-chr4_20636	hsa-mir-novel-chr4_20636	ACCGGGCACUGUGUGGCGUG	-4	down		3
hsa-miR-novel-chr4_21199	hsa-mir-novel-chr4_21199	AGAUGGGGAGAACUCAAUCCU	-6	down		5
hsa-miR-novel-chr4_21437	hsa-mir-novel-chr4_21437	AGGGGCUGUUUGGAGAGAC	-6	down		5
hsa-miR-novel-chr5_21729	hsa-mir-novel-chr5_21729	UAACUGGUUGAACAACUG	-3	down		2
hsa-miR-novel-chr5_21978	hsa-mir-novel-chr5_21978	AGUGGGAGGACUGUCCAGGUG	-8	down		7
hsa-miR-novel-chr5_22289	hsa-mir-novel-chr5_22289	CACGGAGCUCUGUGUGAACGG	-6	down		5
hsa-miR-novel-chr5_22357	hsa-mir-novel-chr5_22357	GGGGAUGUAGCUCAGUGGU	-5.06931	down	100	511
hsa-miR-novel-chr5_22400	hsa-mir-novel-chr5_22400	CUCUUCAGGAUCUGUGGGUAGC	-4	down		3
hsa-miR-novel-chr5_22445	hsa-mir-novel-chr5_22445	UCUUGGGCCCCACCCCUGGAGA	-4	down		3
hsa-miR-novel-chr5_22617	hsa-mir-novel-chr5_22617	UCUGGGGUCUGGCAAAGAGGAUG	-6	down		5
hsa-miR-novel-chr5_22806	hsa-mir-novel-chr5_22806	AGACUGGGCAUAGUCUGAGACAC	-4	down		3
hsa-miR-novel-chr5_22954	hsa-mir-novel-chr5_22954	UCCGGUGUGGAGUCUGGAGACGA	-7	down		6
hsa-miR-novel-chr5_22983	hsa-mir-novel-chr5_22983	AUCUGAAAUCUGAUGAGAAAUU	-4	down		3
hsa-miR-novel-chr6_23477	hsa-mir-novel-chr6_23477	GUGGCUGGGGGAAAGGCGGG	-4	down		3
hsa-miR-novel-chr6_23498	hsa-mir-novel-chr6_23498	UCAGGUGUGGAAACUGAGGCAGG	-6	down		5
hsa-miR-novel-chr6_24135	hsa-mir-novel-chr6_24135	GGGGGUGUAGCUCAGUGGU	-175	down		174
hsa-miR-novel-chr7_24860	hsa-mir-novel-chr7_24860	AGUGCCUGAGGGAGUAAGAGC	-13	down		12
hsa-miR-novel-chr7_24866	hsa-mir-novel-chr7_24866	AGUGCCUGAGGGAGUAAGAGC	-13	down		12
hsa-miR-novel-chr7_24975	hsa-mir-novel-chr7_24975	CCUGCUCUGUGACUCUGAGACA	-3	down		2
hsa-miR-novel-chr7_25009	hsa-mir-novel-chr7_25009	UUUGUCUGUGCCUGCAGG	-6	down		5
hsa-miR-novel-chr7_25390	hsa-mir-novel-chr7_25390	AGUUGGUCCGAGUGUUGUGG	-27.245	down	648	17681
hsa-miR-novel-chr7_25437	hsa-mir-novel-chr7_25437	UGGAAUGGCCUGAAGGUGGA	-17	down		16
hsa-miR-novel-chr7_25490	hsa-mir-novel-chr7_25490	UGAGCGCCUCGACGACAGAGC	-2.44444	down	35	87
hsa-miR-novel-chr7_25563	hsa-mir-novel-chr7_25563	AGGGCUGUGGGGCAGGGA	-7	down		6
hsa-miR-novel-chr7_25708	hsa-mir-novel-chr7_25708	CCUGCUCUGUGACUCUGAGACA	-3	down		2
hsa-miR-novel-chr7_26019	hsa-mir-novel-chr7_26019	UUUGGCAAUGGUAGAACUCACA	-3.54348	down	45	162
hsa-miR-novel-chr8_26516	hsa-mir-novel-chr8_26516	UGGGCUGCGUCAGGCUGAGC	-11	down		10
hsa-miR-novel-chr8_26580	hsa-mir-novel-chr8_26580	ACUGGGAUUGUCCAUCAUGAUG	-6	down		5
hsa-miR-novel-chr8_26767	hsa-mir-novel-chr8_26767	AGAUGAGGCAGGCUCUGCUACGU	-4	down		3
hsa-miR-novel-chr8_26792	hsa-mir-novel-chr8_26792	UGGGAAUGAGGCUUUGGGCGACA	-7	down		6
hsa-miR-novel-chr8_26817	hsa-mir-novel-chr8_26817	AGAGGCUGUUUCUGAGCU	-7.71429	down	20	161
hsa-miR-novel-chr8_27018	hsa-mir-novel-chr8_27018	GUGGGCUUAGAUCAGGUCUGUUCC	-4	down		3
hsa-miR-novel-chr8_27145	hsa-mir-novel-chr8_27145	AGCACUUGUGGAUGCUGAG	-6	down		5
hsa-miR-novel-chr9_27523	hsa-mir-novel-chr9_27523	AUCACAUUGCCAGGGAUU	-51.7419	down	30	1603
hsa-miR-novel-chr9_27922	hsa-mir-novel-chr9_27922	AACGGAUGGCUCUGCCCA	-4	down		3
hsa-miR-novel-chr9_28118	hsa-mir-novel-chr9_28118	GUUCCUGCUGAACUGAGCCAGU	-3	down		2
hsa-miR-novel-chr9_28145	hsa-mir-novel-chr9_28145	CUGUGUCGGGCAUUACCAGAA	-6	down		5
hsa-miR-novel-chr9_28270	hsa-mir-novel-chr9_28270	AUUUUGCUGUGGAGCGGCG	-7	down		6
hsa-miR-novel-chrX_28480	hsa-mir-novel-chrX_28480	AUCCUAGCUUGCCUGAGACUG	-23	down		22
hsa-miR-novel-chrX_29044	hsa-mir-novel-chrX_29044	AGCUACAUUGUCUGCUGGGUUUCA	-6	down		5
hsa-miR-novel-chrX_29172	hsa-mir-novel-chrX_29172	ACUCCAGCCCCACAGCCUCAG	-23	down		22

## Sheet: up.paired.Experiment_vs_Contro
miRNA expression for Experiment vs Control Fold Change cutoff: 1.5 P-value cutoff: 0.05 Column A: Mature miRNA, the mature miRNA name. Column B: Pre-miRNA, the pre-miRNA name. Column C: Sequence, the mature miRNA sequence. Column D: Fold change, Fold change between two groups. Column E: P-value, P-value is calculated by paired t-test. Column F: FDR, BH-adjusted P-value. Column G: Regulation, 'up'…
miRNA Information			Statistics & Regulation				Mean		Tag counts (normalized)
mature-miRNA	pre-miRNA	mature-sequence	Fold Change	P-value	FDR	Regulation	group Experiment	group Control	After-1	After-2	After-3	Before-1	Before-2	Before-3
hsa-miR-106b-3p	hsa-mir-106b	CCGCACUGUGGGUACUUGCUGC	2.34328	0.0225472	0.504038	up	52.3333	22.3333	45	39	70	18		46
hsa-miR-18a-5p	hsa-mir-18a	UAAGGUGCAUCUAGUGCAGAUAG	2.02703	0.0454149	0.504038	up	75	37	90	52	80	66	15	27
hsa-miR-200a-3p	hsa-mir-200a	UAACACUGUCUGGUAACGAUGU	1.9125	0.0240607	0.504038	up	51	26.6667	45	65	40	24	45	8
hsa-miR-30a-3p	hsa-mir-30a	CUUUCAGUCGGAUGUUUGCAGC	3.97701	0.0135963	0.504038	up	115.333	29	136	117	90	30	45	9
hsa-miR-30b-5p	hsa-mir-30b	UGUAAACAUCCUACACUCAGCU	1.87591	0.0235185	0.504038	up	514	274	633	507	399	465	249	105
hsa-miR-339-5p	hsa-mir-339	UCCCUGUCCUCCAGGAGCUCACG	2.42763	0.0106166	0.504038	up	123	50.6667	136	130	100	77	57	15
hsa-miR-361-5p	hsa-mir-361	UUAUCAGAAUCUCCAGGGGUAC	2.96	0.0211088	0.504038	up	74	25	68	91	60	18	30	24
hsa-miR-484	hsa-mir-484	UCAGGCUCAGUCCCCUCCCGAU	3.64706	0.0014782	0.504038	up	62	17	45	78	60		30	18
hsa-miR-novel-chr5_22142	hsa-mir-novel-chr5_22142	AAAGAACUUUGAAAAGAG	7.77273	0.037065	0.504038	up	114	14.6667	136	143	60	18	23

## Sheet: dn.paired.Experiment_vs_Contro
miRNA expression for Experiment vs Control Fold Change cutoff: 1.5 P-value cutoff: 0.05 Column A: Mature miRNA, the mature miRNA name. Column B: Pre-miRNA, the pre-miRNA name. Column C: Sequence, the mature miRNA sequence. Column D: Fold change, Fold change between two groups. Column E: P-value, P-value is calculated by paired t-test. Column F: FDR, BH-adjusted P-value. Column G: Regulation, 'up'…
miRNA Information			Statistics & Regulation				Mean		Tag counts (normalized)
mature-miRNA	pre-miRNA	mature-sequence	Fold Change	P-value	FDR	Regulation	group Experiment	group Control	After-1	After-2	After-3	Before-1	Before-2	Before-3
hsa-let-7b-5p	hsa-let-7b	UGAGGUAGUAGGUUGUGUGGUU	-2.00817	0.0466217	0.504038	down	1998.33	4013	2079	754	3159	3236	2956	5844
hsa-miR-1307-3p	hsa-mir-1307	ACUCGGCGUGGCGUCGGUCGUG	-2.825	0.0428055	0.504038	down	66.6667	188.333		137	60	119	215	228
hsa-miR-370-3p	hsa-mir-370	GCCUGCUGGGGUGGAACCUGGU	-10.2917	0.0398406	0.504038	down	16	164.667	45			137	197	157
hsa-miR-451a	hsa-mir-451a	AAACCGUUACCAUUACUGAGUU	-2.54267	0.00137647	0.504038	down	882.667	2244.33	723	507	1415	2056	1799	2875
hsa-miR-501-3p	hsa-mir-501	AAUGCACCCGGGCAAGGAUUCU	-3.90909	0.0192843	0.504038	down	11	43			30	36	23	67
hsa-miR-652-3p	hsa-mir-652	AAUGGCGCCACUAGGGUUGUG	-8.39885	0.0284382	0.504038	down	405.333	3404.33	362	104	747	2432	3175	4603
hsa-miR-novel-chr15_6643	hsa-mir-novel-chr15_6643	UGGGUUUACGUUGGGAGAACUU	-4.63538	0.0046504	0.504038	down	216.667	1004.33	57	52	538	739	911	1360
hsa-miR-novel-chr7_25437	hsa-mir-novel-chr7_25437	UGGAAUGGCCUGAAGGUGGA	-15.3333	0.00695754	0.504038	down	1	15.3333				12	15	16
